# Supplementary material
Source: PubMed Central journal article supplement (PMC8132194)
Supplement: NIHMS1697455-supplement-1.pdf [file NIHMS1697455-supplement-1.pdf]

# **Efficacy and safety of dolutegravir- and tenofovir alafenamide fumarate-containing HIV antiretroviral treatment regimens started in pregnancy: a randomized controlled trial**

Shahin Lockman, M.D., Sean S. Brummel, Ph.D., Lauren Ziemba, M.S., Lynda Stranix-Chibanda, M.B.Ch.B., M.Med. Paeds., Katie McCarthy, M.P.H., Anne Coletti, M.S., Patrick Jean-Philippe, M.D., Ben Johnston, B.S., Chelsea Krotje, M.P.H., Lee Fairlie, M.B.Ch.B., Risa M. Hoffman, M.D., M.P.H., Paul E. Sax, M.D., Sikhulile Moyo, Ph.D., Nahida Chakhtoura, M.D., Jeffrey S. A. Stringer, M.D., Gaerolwe Masheto, M.D., Violet Korutaro, M.B.Ch.B., Haseena Cassim, M.B.Ch.B., Blandina T. Mmbaga, M.D., Ph.D., Esau João, M.D., Ph.D., Sherika Hanley, M.B.Ch.B., Lynette Purdue, Pharm.D., Lewis B. Holmes, M.D., Jeremiah D. Momper, Pharm.D., Ph.D., Roger L. Shapiro, M.D., Navdeep K. Thoofer, Ph.D., James F. Rooney, M.D., Lisa M. Frenkel, M.D., K. Rivet Amico, Ph.D., Lameck Chinula, M.D., Judith Currier, M.D., and the IMPAACT /VESTED Study Team and Investigators

## **Supplementary Appendix**

|                                                                                                                                           |    |
|-------------------------------------------------------------------------------------------------------------------------------------------|----|
| Additional Study Population Information .....                                                                                             | 3  |
| Inclusion Criteria .....                                                                                                                  | 3  |
| Exclusion Criteria .....                                                                                                                  | 3  |
| Additional Statistical Analysis Information .....                                                                                         | 4  |
| Efficacy .....                                                                                                                            | 4  |
| Composite of Spontaneous Abortion, Stillbirth, Preterm Delivery, or Small for Gestational Age .....                                       | 5  |
| Safety Outcome 2/3: Grade 3 or Higher Adverse Events .....                                                                                | 5  |
| Neonatal Death.....                                                                                                                       | 5  |
| Weight Gain .....                                                                                                                         | 5  |
| Creatinine and Creatinine Clearance.....                                                                                                  | 5  |
| Table S1: Modification to Randomized Treatment in Antepartum Follow Up.....                                                               | 6  |
| Table S2: Reasons for First Modification of Randomized Treatment in Antepartum Follow Up.....                                             | 7  |
| Table S3: Time until Viral Suppression before Delivery.....                                                                               | 8  |
| Table S4: FDA snapshot of Viral Load Suppression at Delivery.....                                                                         | 9  |
| Table S5: Sensitivity analysis of the primary viral suppression outcome using multiple imputation to impute missing viral load data ..... | 10 |
| Table S6: Preterm Deliveries and Live Born Infants Small for Gestational Age.....                                                         | 11 |

|                                                                                                                     |    |
|---------------------------------------------------------------------------------------------------------------------|----|
| Table S7: Stillbirths on Study .....                                                                                | 12 |
| Table S8: Maternal Grade 2 or Higher Adverse Events Post Randomization through 14 Days after Pregnancy Outcome..... | 13 |
| Table S9: Maternal Safety Outcome Measure through 14 Days after Pregnancy Outcome by Treatment Group .....          | 17 |
| Table S10: Secondary Analysis Comparisons of Maternal Renal Labs at Delivery .....                                  | 18 |
| Table S11: Average Weekly Maternal Antepartum Weight Gain.....                                                      | 19 |
| Table S12: Sensitivity Analysis of Average Weekly Maternal Antepartum Weight Gain.....                              | 20 |
| Table S13: Average Weekly Maternal Antepartum Weight Gain by Country .....                                          | 21 |
| Table S14: Infant Grade 2 or Higher Adverse Events Post Randomization through 14 Days after Pregnancy Outcome.....  | 22 |
| Table S15: Infant Safety Outcome Measure through 28 Days after Birth by Treatment Group .....                       | 25 |
| Table S16: Infants Preterm and Small for Gestational Age .....                                                      | 26 |
| Table S17: Neonatal Deaths among Live Birth Infants.....                                                            | 27 |
| Table S18: Infant Neonatal Death Narratives .....                                                                   | 28 |
| Table S19: Post-hoc Analysis for Pairwise Differences in Stillbirth or Neonatal Deaths.....                         | 30 |
| Table S20: Endpoint Review Determination of Major Congenital Anomalies by Group.....                                | 31 |
| Table S21: Listing of Site Reported Suspected Congenital Anomalies and Endpoint Review Determination.....           | 32 |
| Table S22: Infant Infection Details .....                                                                           | 35 |
| Figure S1: Time until HIV-1 RNA Viral Load <400 Copies/mL .....                                                     | 36 |
| Figure S2: Time until HIV-1 RNA Viral Load <1,000 Copies/mL .....                                                   | 37 |
| Figure S3: Additional Pairwise Comparisons for the in the Primary Adverse Pregnancy Outcome Measures .....          | 38 |
| Figure S4: Mean (95% CI) Maternal Weight Change from Baseline by Study Week .....                                   | 39 |
| Figure S5: Mean Change in Weight from Baseline by Treatment, Study Visit, and Gestational Age.....                  | 40 |
| Reference .....                                                                                                     | 41 |

## **Additional Study Population Information**

### **Inclusion Criteria**

- Mother is at least 18 years of age and willing and able to provide written informed consent for her and her infant's participation in this study
- Mother has confirmed HIV-1 infection based on documented testing of two samples collected at different time points
- At screening, mother is ART-naïve, defined as having not received prior antiretroviral therapy other than ARVs received during prior pregnancies or prior periods of breastfeeding (i.e., receipt of any single, dual, or triple ARV regimen during prior time-limited periods of pregnancy and breastfeeding is permitted). Receipt of up to 14 days of ARVs during the current pregnancy is permitted prior to study entry so that initiation of ARVs during the current pregnancy is not delayed during the study screening period.
- At screening, mother has the following laboratory test results (based on testing of samples collected within 14 days prior to study entry):
- Grade 1 or lower ( $<2.5$  x upper limit of normal) alanine aminotransferase (ALT) and aspartate aminotransferase (AST); Grade 2 or lower ( $\leq 1.8$  x ULN) creatinine; Grade 2 or lower ( $\geq 60$  mL/min) estimated creatinine clearance (Cockcroft-Gault formula)
- At screening and at study entry, no evidence of multiple gestation or fetal anomalies, as assessed by best available method
- At study entry, gestational age of 14-28 weeks, defined as greater than 13 weeks plus six days and less than 28 completed weeks gestation, estimated by best available method
- At study entry, mother expects to remain in the geographic area of the study site during pregnancy and for 50 weeks postpartum
- With Letter of Amendment dated 20 July 2018: At study entry, mother reports that she does not wish to become pregnant again for at least 50 weeks after her current pregnancy and that she is willing to use effective contraception during this period. Effective contraception may include surgical sterilization (i.e., hysterectomy, bilateral oophorectomy, tubal ligation, or salpingectomy) or any of the following methods:
  - Contraceptive intrauterine device (IUD) or intrauterine system (IUS)
  - Subdermal contraceptive implant
  - Progestogen injections
  - Progestogen only oral contraceptive pills
  - Combined estrogen and progestogen oral contraceptive pills
  - Percutaneous contraceptive patches

### **Exclusion Criteria**

- Mother is currently incarcerated or involuntarily confined in a medical facility
- Mother is currently receiving:
  - A psychoactive medication for treatment of a psychiatric illness
  - Treatment for active tuberculosis
  - Treatment for active hepatitis C infection
- Mother is expected to require treatment with interferon and/or ribavirin for hepatitis C infection during the study follow-up period
- Mother has a history of any of the following, as determined by the site investigator or designee based on maternal report and available medical records:
  - Hypersensitivity or clinically significant adverse reaction to any of the ARVs included in the three study drug regimens (ever)
  - Antiretroviral drug resistance mutations that would impact selection of ART regimen (ever)
  - Clinically significant heart disease and/or known prolonged QTc interval (ever)

- Suicidal ideation or attempt (ever)
- HIV-2 infection (ever)
- Zika virus infection, diagnosed or suspected, during the current pregnancy
- Receipt of any antiretroviral medication within six months prior to study entry, with two exceptions: receipt of any duration of TDF or FTC/TDF for pre-exposure prophylaxis or receipt of up to 14 days of ARVs during the current pregnancy
- Receipt of any prohibited medication within 14 days prior to study entry
- Clinically significant acute illness requiring systemic treatment and/or hospitalization within 14 days prior to study entry
- Unstable liver disease (defined by the presence of ascites, encephalopathy, coagulopathy, hypoalbuminemia, esophageal or gastric varices, or persistent jaundice) or known biliary abnormalities (with the exception of Gilbert’s syndrome or asymptomatic gallstones) within 14 days prior to study entry
- Mother or fetus has any other condition that, in the opinion of the site investigator or designee, would make participation in the study unsafe, complicate interpretation of study outcome data, or otherwise interfere with achieving the study objectives

### **Additional Statistical Analysis Information**

#### **Efficacy**

The primary efficacy analyses of viral suppression combined the two DTG-containing groups for comparison to the EFV-containing group. Viral suppression was compared using a difference in binomial proportions with a success defined as plasma HIV-1 RNA viral load <200 copies/mL at the time of the pregnancy outcome. Women with a viral load recorded on or within 14 days after delivery were evaluable for the primary efficacy outcome measure. The earliest viral load within this window was the outcome measure for each participant.

First, non-inferiority analyses were conducted, and if non-inferiority was established, a superiority analysis was conducted. Both intent-to-treat (ITT) and per-protocol analyses were performed; for the non-inferiority analyses, the ITT and per-protocol analyses were to be given equal weight, but for the superiority analyses, the ITT analysis was the primary analysis. Non-inferiority was assessed on the following criteria:

- 1) the 95% confidence interval for the difference in success proportions excluded the non-inferiority margin of -10%, in favor of the EFV group (note that no p-value was calculated to test for non-inferiority);
- 2) the study was conducted with a high degree of consistency with the IMPAACT 2010 protocol;
- 3) the EFV-containing group showed its usual efficacy; and
- 4) the ITT and the per-protocol analyses showed similar results.

To account for missing viral loads at delivery, a sensitivity analysis for the primary efficacy analysis of viral suppression at delivery was conducted using multiple imputation. A total 38 delivery viral loads were imputed, resulting in a complete set of 643 delivery viral loads. Imputation models were created for each treatment group. The imputation models included all measured viral loads at entry, weeks 4, 8, 12, and 24, and delivery. The multiple imputation models each used a linear mixed effects model with polynomial smoothing splines that modeled the observed viral loads over time. The complexity of the polynomial smoothing spline was selected using the Bayesian Information Criteria (BIC). The imputation models included random effects for the intercept and the spline beta coefficients. Delivery imputations used the participant specific random effect, which can account for unmeasured sources of variability. No other auxiliary variables were included in the model. Missing viral loads were imputed 1,000 times and the results were averaged using multiple imputation combination rules.

The FDA snapshot algorithm was used for a secondary analysis of viral load efficacy. The FDA snapshot algorithm defined a woman as a virologic success if her viral load was under a threshold for virologic suppression while taking her randomized treatment. Women failed the snapshot algorithm if they interrupted or discontinued

study treatment, had a missing viral load at the time point of interest, or had a viral load equal to or above the suppression threshold. For IMPAACT 2010, the definition of study treatment interruption or discontinuation was consistent with the per-protocol definition. Women taking the randomized study treatment with a plasma HIV-1 RNA viral load <200 copies/mL at delivery were considered a virologic success for the FDA snapshot analysis.

A secondary analysis summarized the time to viral suppression using a Kaplan-Meier and a log-rank test. Effect estimates (95% CI) were calculated using Cox-proportional hazards regression models.

### **Composite of Spontaneous Abortion, Stillbirth, Preterm Delivery, or Small for Gestational Age**

Comparisons were summarized using a Wald estimate of the difference in binomial proportions with an event defined as the occurrence of a spontaneous abortion (<20 weeks gestation), stillbirth ( $\geq$ 20 weeks gestation), preterm delivery (<37 weeks gestation), or small for gestational age (<10<sup>th</sup> percentile, adjusted for sex). Supplemental analyses that counted women who discontinued the study early as failures and any missing outcome as failures were included to investigate the influence of missing data on the analysis conclusion.

### **Safety Outcome 2/3: Grade 3 or Higher Adverse Events**

The final primary adverse event safety analyses after the end of study follow-up is to be based on a Kaplan-Meier estimate of the event probability of experiencing a grade 3 or higher adverse event through 50 weeks postpartum. For the analysis of maternal safety outcomes in this manuscript, the survival probability curves of experiencing a grade 3 or higher adverse event from randomization through 14 days postpartum for mothers and 28 days for infants was compared between treatment groups using a log-rank test. The log-rank test was pre-specified as the testing strategy while follow-up is ongoing. To investigate the influence of missing data on the analysis conclusion, a supplemental analysis was conducted that included participants who discontinued the study early as events.

### **Neonatal Death**

A secondary outcome of time until infant death through 50 weeks after birth will be summarized once infant follow-up is complete. Similarly to the primary analysis of infant safety, a post-hoc analysis compared time until infant death within the first 28 days of life with a log-rank test while follow-up is ongoing.

### **Weight Gain**

The weight gain analyses were added as a secondary analysis while study follow-up was ongoing after reports of an increase in weight among women on DTG, particularly among those taking TAF. The study statisticians were unblinded at that point in the study; however, the statisticians had not summarized weight gain until after the selection of the statistical methodology. Nevertheless, this analysis could reasonably be viewed as post-hoc.

By-group differences in the average weekly gain in maternal weight were estimated and tested using generalized estimating equations with an identity link function, an independent mean and variance relationship (normal model), and an exchangeable working correlation matrix clustered on the individual level. A sensitivity analysis for differences in maternal weight gain was conducted to account for possible by-group differences in gestational age at each study visit due to loss to follow-up, fetal loss, or preterm delivery. Time-varying weights were employed to standardize the gestational age distribution to the observed gestational age distribution in the EFV/FTC/TDF group at each study visit during the antepartum period to account for possible differences in follow-up during pregnancy. Although the sensitivity analysis changed some p-values from statistically significant to not-significant, the overall by group pattern remained the same. Per-protocol analyses were added as post-hoc analyses.

### **Creatinine and Creatinine Clearance**

Creatinine and creatinine clearance were compared between treatment arms at delivery with a t-test assuming unequal variance.

**Table S1: Modification to Randomized Treatment in Antepartum Follow Up**

| <b>Treatment Group</b> | <b>Treatment Group Count</b> | <b>Treatment End Study Week</b> | <b>Treatment</b> | <b>Antepartum Modification<sup>1</sup></b> | <b>Reason</b>                          | <b>Subsequent Treatment</b> |
|------------------------|------------------------------|---------------------------------|------------------|--------------------------------------------|----------------------------------------|-----------------------------|
| DTG+FTC/TAF            | 1                            | 12.0                            | DTG+FTC/TAF      | Stopped                                    | Lost to Follow Up                      |                             |
|                        | 2                            | 4.0                             | DTG+FTC/TAF      | Stopped                                    | Withdrawal By Participant              |                             |
|                        | 3                            | 1.0                             | DTG+FTC/TAF      | Paused                                     | Adverse Event                          |                             |
|                        | 4                            | 2.0                             | DTG+FTC/TAF      | Stopped                                    | Lost to Follow Up                      |                             |
|                        | 5                            | 12.9                            | DTG+FTC/TAF      | Stopped                                    | Relocated                              |                             |
|                        | 6                            | 4.4                             | DTG+FTC/TAF      | Stopped                                    | Withdrawal Of Consent                  |                             |
|                        | 7                            | 22.0                            | DTG+FTC/TAF      | Stopped                                    | Not Interested in Continuing the Study |                             |
| DTG+FTC/TDF            | 1                            | 4.1                             | DTG+FTC/TDF      | Switched                                   | Withdrawal Of Consent                  | EFV/FTC/TDF                 |
|                        | 2                            | 3.0                             | DTG+FTC/TDF      | Stopped                                    | Withdrawal Of Consent                  |                             |
|                        | 3                            | 12.3                            | DTG+FTC/TDF      | Stopped                                    | Non-Compliance                         |                             |
|                        | 4                            | 11.0                            | DTG+FTC/TDF      | Stopped                                    | Withdrawal Of Consent                  |                             |
|                        | 5                            | 11.1                            | DTG+FTC/TDF      | Paused                                     | Non-Adherence                          |                             |
| EFV/FTC/TDF            |                              | 21.4                            | DTG+FTC/TDF      | Paused                                     | Non-Adherence                          |                             |
|                        | 1                            | 3.6                             | EFV/FTC/TDF      | Stopped                                    | Non-Compliance                         |                             |
|                        | 2                            | 8.7                             | EFV/FTC/TDF      | Switched                                   | Persistent Viremia                     | DTG+FTC/TDF                 |
|                        | 3                            | 9.0                             | EFV/FTC/TDF      | Switched                                   | Persistent Viremia                     | DTG+FTC/TDF                 |
|                        | 4                            | 23.9                            | EFV/FTC/TDF      | Stopped                                    | Relocated                              |                             |
|                        | 5                            | 0.0                             | EFV/FTC/TDF      | Paused                                     | Difficulty Swallowing Tablets          |                             |
|                        | 6                            | 11.1                            | EFV/FTC/TDF      | Paused                                     | Unable To Obtain Medication            |                             |
|                        | 7                            | 16.7                            | EFV/FTC/TDF      | Paused                                     | Non-Compliance                         |                             |
|                        | 8                            |                                 | EFV/FTC/TDF      | No Antepartum Exposure                     | Started Treatment After Delivery       |                             |
|                        | 9                            | 0.7                             | EFV/FTC/TDF      | Paused                                     | Non-Adherence                          |                             |
|                        | 10                           | 2.7                             | EFV/FTC/TDF      | Switched                                   | Resistance Related to EFV              | DTG+FTC/TAF                 |
|                        | 11                           | 18.0                            | EFV/FTC/TDF      | Paused                                     | Non-Adherence                          |                             |
|                        | 12                           | 13.3                            | EFV/FTC/TDF      | Switched                                   | Adverse Event                          | DTG+FTC/TAF                 |
|                        | 13                           | 5.9                             | EFV/FTC/TDF      | Switched                                   | Resistance Related to EFV              | DTG+FTC/TDF                 |
| 14                     | 0.3                          | EFV/FTC/TDF                     | Switched         | Resistance Related to EFV                  | DTG+FTC/TDF                            |                             |

**Table S2: Reasons for First Modification of Randomized Treatment in Antepartum Follow Up**

| Antepartum Modification <sup>1</sup> | Reason                           | Treatment Arm        |                      |                      | Total<br>N (%)   |
|--------------------------------------|----------------------------------|----------------------|----------------------|----------------------|------------------|
|                                      |                                  | DTG+FTC/TAF<br>N (%) | DTG+FTC/TDF<br>N (%) | EFV/FTC/TDF<br>N (%) |                  |
| <b>Stopped</b>                       | <b>Total</b>                     | <b>6 (2.8%)</b>      | <b>3 (1.4%)</b>      | <b>2 (0.9%)</b>      | <b>11 (1.7%)</b> |
|                                      | Withdrawal Of Consent            | 1 (0.5%)             | 2 (0.9%)             | 0 (0.0%)             | 3 (0.5%)         |
|                                      | Lost to Follow Up                | 2 (0.9%)             | 0 (0.0%)             | 0 (0.0%)             | 2 (0.3%)         |
|                                      | Non-Compliance                   | 0 (0.0%)             | 1 (0.5%)             | 1 (0.5%)             | 2 (0.3%)         |
|                                      | Relocated                        | 1 (0.5%)             | 0 (0.0%)             | 1 (0.5%)             | 2 (0.3%)         |
|                                      | Not Interested in the Study      | 1 (0.5%)             | 0 (0.0%)             | 0 (0.0%)             | 1 (0.2%)         |
|                                      | Withdrawal By Participant        | 1 (0.5%)             | 0 (0.0%)             | 0 (0.0%)             | 1 (0.2%)         |
| <b>Switched</b>                      | <b>Total</b>                     | <b>0 (0.0%)</b>      | <b>1 (0.5%)</b>      | <b>6 (2.8%)</b>      | <b>7 (1.1%)</b>  |
|                                      | Withdrawal Of Consent            | 0 (0.0%)             | 1 (0.5%)             | 0 (0.0%)             | 1 (0.2%)         |
|                                      | Resistance Related to EFV        | 0 (0.0%)             | 0 (0.0%)             | 3 (1.4%)             | 3 (0.5%)         |
|                                      | Persistent Viremia               | 0 (0.0%)             | 0 (0.0%)             | 2 (0.9%)             | 2 (0.3%)         |
|                                      | Adverse Event                    | 0 (0.0%)             | 0 (0.0%)             | 1 (0.5%)             | 1 (0.2%)         |
| <b>Paused</b>                        | <b>Total</b>                     | <b>1 (0.5%)</b>      | <b>1 (0.5%)</b>      | <b>5 (2.4%)</b>      | <b>7 (1.1%)</b>  |
|                                      | Non Adherence                    | 0 (0.0%)             | 1 (0.5%)             | 2 (0.9%)             | 3 (0.5%)         |
|                                      | Non-Compliance                   | 0 (0.0%)             | 0 (0.0%)             | 1 (0.5%)             | 1 (0.2%)         |
|                                      | Adverse Event                    | 1 (0.5%)             | 0 (0.0%)             | 0 (0.0%)             | 1 (0.2%)         |
|                                      | Difficulty Swallowing Tablets    | 0 (0.0%)             | 0 (0.0%)             | 1 (0.5%)             | 1 (0.2%)         |
|                                      | Unable To Obtain Medication      | 0 (0.0%)             | 0 (0.0%)             | 1 (0.5%)             | 1 (0.2%)         |
| <b>No Antepartum Exposure</b>        | <b>Total</b>                     | <b>0 (0.0%)</b>      | <b>0 (0.0%)</b>      | <b>1 (0.5%)</b>      | <b>1 (0.2%)</b>  |
|                                      | Started Treatment After Delivery | 0 (0.0%)             | 0 (0.0%)             | 1 (0.5%)             | 1 (0.2%)         |

**Table S3: Time until Viral Suppression before Delivery**

| <b>Plasma HIV-1 RNA Viral Load<br/>Suppression Threshold</b> | <b>Number Suppressed/Number at Risk</b> |                      |              | <b>Hazard Ratio<br/>DTG Groups/EFV Group<br/>(95% CI)</b> | <b>Log-Rank<br/>P-value</b> |
|--------------------------------------------------------------|-----------------------------------------|----------------------|--------------|-----------------------------------------------------------|-----------------------------|
|                                                              | <b>DTG<br/>Groups</b>                   | <b>EFV<br/>Group</b> | <b>Total</b> |                                                           |                             |
| <200 copies/mL                                               | 294/304                                 | 142/158              | 436/462      | 2.4 (1.9, 3.1)                                            | < 0.001                     |
| <400 copies/mL                                               | 257/266                                 | 133/141              | 390/407      | 1.7 (1.3, 2.2)                                            | < 0.001                     |
| <1000 copies/mL                                              | 189/198                                 | 113/119              | 302/317      | 1.4 (1.1, 1.9)                                            | 0.018                       |



**Table S4: FDA snapshot of Viral Load Suppression at Delivery**

| Virologic Success at Delivery <sup>1</sup> ? | Treatment Group      |                      |                      | DTG+FTC/TAF vs<br>DTG+FTC/TDF |                      | DTG+FTC/TDF vs<br>EFV/FTC/TDF |                      | DTG+FTC/TAF vs<br>EFV/FTC/TDF |                      |
|----------------------------------------------|----------------------|----------------------|----------------------|-------------------------------|----------------------|-------------------------------|----------------------|-------------------------------|----------------------|
|                                              | DTG+FTC/TAF<br>N (%) | DTG+FTC/TDF<br>N (%) | EFV/FTC/TDF<br>N (%) | Difference (95% CI)           | P-value <sup>2</sup> | Difference (95% CI)           | P-value <sup>2</sup> | Difference (95% CI)           | P-value <sup>2</sup> |
| Virologic Success                            | 191 (88.0%)          | 198 (92.1%)          | 171 (81.0%)          | 4.1% (-1.6%, 9.7%)            | 0.16                 | -11.1% (-17.5%, -4.6%)        | < 0.001              | -7.0% (-13.8%, -0.1%)         | 0.045                |
| Virologic Non-Success or Missing Data        | 26 (12.0%)           | 17 (7.9%)            | 40 (19.0%)           |                               |                      |                               |                      |                               |                      |
| <b>Total</b>                                 | <b>217 (100.0%)</b>  | <b>215 (100.0%)</b>  | <b>211 (100.0%)</b>  |                               |                      |                               |                      |                               |                      |

<sup>1</sup>Delivery plasma HIV-1 RNA viral load for the primary efficacy outcome measure was defined as the closest viral load on or within 14 days after delivery.

<sup>2</sup>P-value for the difference in the two indicated proportions.

**Table S5: Sensitivity analysis of the primary viral suppression outcome using multiple imputation to impute missing viral load data**

|                                                         | Treatment Groups      |                      | Difference in Proportions | 95% CI        | P-Value <sup>2</sup> |
|---------------------------------------------------------|-----------------------|----------------------|---------------------------|---------------|----------------------|
|                                                         | DTG Groups<br>(N=432) | EFV Group<br>(N=211) |                           |               |                      |
| <b>Delivery<sup>1</sup> Plasma HIV-1 RNA Viral Load</b> | <b>%</b>              | <b>%</b>             |                           |               |                      |
| <200 copies/mL                                          | 97.3%                 | 90.7%                | 6.6%                      | (2.3%, 10.9%) | 0.003                |
| ≥200 copies/mL                                          | 2.7%                  | 9.3%                 |                           |               |                      |

<sup>1</sup>Delivery plasma HIV-1 RNA viral load for the primary efficacy outcome measure was defined as the closest viral load on or within 14 days after delivery.

<sup>2</sup>P-value tests for the difference in proportions with a null hypothesis of no difference.

**Table S6: Preterm Deliveries and Live Born Infants Small for Gestational Age**

| Outcome                                      | Treatment Group       |                       |                       |                       |                       |                       | Total<br>n/N (%)       |
|----------------------------------------------|-----------------------|-----------------------|-----------------------|-----------------------|-----------------------|-----------------------|------------------------|
|                                              | DTG+FTC/TAF           |                       | DTG+FTC/TDF           |                       | EFV/FTC/TDF           |                       |                        |
|                                              | n/N (%)               | 95% CI                | n/N (%)               | 95% CI                | n/N (%)               | 95% CI                |                        |
| <b>Stillbirths</b>                           | <b>8/216 (3.7%)</b>   | <b>(1.2%, 6.2%)</b>   | <b>11/213 (5.2%)</b>  | <b>(2.2%, 8.1%)</b>   | <b>4/211 (1.9%)</b>   | <b>(0.1%, 3.7%)</b>   | <b>23/640 (3.6%)</b>   |
| <b>Preterm Stillbirths &amp; Live Births</b> | <b>18/216 (8.3%)</b>  | <b>(4.6%, 12.0%)</b>  | <b>28/213 (13.1%)</b> | <b>(8.6%, 17.7%)</b>  | <b>27/211 (12.8%)</b> | <b>(8.3%, 17.3%)</b>  | <b>73/640 (11.4%)</b>  |
| <b>Preterm Live Births</b>                   | <b>12/208 (5.8%)</b>  | <b>(2.6%, 8.9%)</b>   | <b>19/202 (9.4%)</b>  | <b>(5.4%, 13.4%)</b>  | <b>25/207 (12.1%)</b> | <b>(7.6%, 16.5%)</b>  | <b>56/617 (9.1%)</b>   |
| <32 Weeks                                    | 1/208 (0.5%)          | (0.0%, 1.4%)          | 2/202 (1.0%)          | (0.0%, 2.4%)          | 6/207 (2.9%)          | (0.6%, 5.2%)          | 9/617 (1.5%)           |
| 32-<37 Weeks                                 | 11/208 (5.3%)         | (2.2%, 8.3%)          | 17/202 (8.4%)         | (4.6%, 12.2%)         | 19/207 (9.2%)         | (5.2%, 13.1%)         | 47/617 (7.6%)          |
| <b>Small for Gestational Age</b>             | <b>33/202 (16.3%)</b> | <b>(11.2%, 21.4%)</b> | <b>45/200 (22.5%)</b> | <b>(16.7%, 28.3%)</b> | <b>41/200 (20.5%)</b> | <b>(14.9%, 26.1%)</b> | <b>119/602 (19.8%)</b> |
| <5th Percentile                              | 12/202 (5.9%)         | (2.7%, 9.2%)          | 24/200 (12.0%)        | (7.5%, 16.5%)         | 22/200 (11.0%)        | (6.7%, 15.3%)         | 58/602 (9.6%)          |
| 5th-<10th Percentile                         | 21/202 (10.4%)        | (6.2%, 14.6%)         | 21/200 (10.5%)        | (6.3%, 14.7%)         | 19/200 (9.5%)         | (5.4%, 13.6%)         | 61/602 (10.1%)         |

**Table S7: Stillbirths on Study**

| Treatment Group    | Treatment Group Count | Gestational Age at Stillbirth | Time of Diagnosis | Type of Labor | Narrative of Pregnancy Outcome Circumstances                                                                                                                                                          |
|--------------------|-----------------------|-------------------------------|-------------------|---------------|-------------------------------------------------------------------------------------------------------------------------------------------------------------------------------------------------------|
| <b>DTG+FTC/TAF</b> | 1                     | 24                            | During labor      | Spontaneous   | had prom on [REDACTED] then delivered a macerated still baby on [REDACTED].                                                                                                                           |
|                    | 2                     | 25                            | Prior to labor    | Induced       | NORMAL DELIVERY                                                                                                                                                                                       |
|                    | 3                     | 27                            | Unknown           |               | Mother developed Grade 3 gestational hypertension [REDACTED],Mother reported fetal demise on [REDACTED].EDD [REDACTED]                                                                                |
|                    | 4                     | 31                            | Prior to labor    | Induced       | MOTHER DELIVERED A STILL BIRTH BABY                                                                                                                                                                   |
|                    | 5                     | 35                            | Prior to labor    | Induced       | Normal Vertex Delivery of macerated stillbirth                                                                                                                                                        |
|                    | 6                     | 36                            | Prior to labor    | Induced       | participant complained of not feeling foetal movement. intra uterine foetal death confirmed on sonar                                                                                                  |
|                    | 7                     | 40                            | During labor      | Spontaneous   | Mother got a ruptured uterus and Fresh still birth                                                                                                                                                    |
|                    | 8                     | 42                            | At delivery       | Spontaneous   | Caesarian section was done for delayed second stage and post dates                                                                                                                                    |
| <b>DTG+FTC/TDF</b> | 1                     | 20                            | At delivery       | Spontaneous   | experienced abdominal pain reported to the local hospital where she had a miscarriage on the same day                                                                                                 |
|                    | 2                     | 24                            | At delivery       | Spontaneous   | Inevitable miscarriage >20weeks of gestation                                                                                                                                                          |
|                    | 3                     | 26                            | At delivery       | Spontaneous   | Participant reported that on [REDACTED] around 00:00 she started experiencing lower abdominal pain. At 7:00 she went to her nearby hospital where abdominal pain continued and expelled dead fetus.   |
|                    | 4                     | 27                            | Prior to labor    | Induced       | Abruptio placentae grade 3. Labour induced, Delivered a 1.02kg macerated male still birth                                                                                                             |
|                    | 5                     | 31                            | Unknown           | Spontaneous   | Gave birth to a stillborn baby at home.                                                                                                                                                               |
|                    | 6                     | 31                            | During labor      | Spontaneous   | On [REDACTED],mother fell down on her way home,felt mild contractions that night and the following day at a health center where an IUFD was diagnosed by bedside USS as mother was in labour          |
|                    | 7                     | 31                            | Prior to labor    | Induced       | During hospital admission for pre-eclampsia and decreased foetal movements, participant developed an abruptio placenta (gr3B) and intra uterine fetal demise                                          |
|                    | 8                     | 35                            | Prior to labor    | Induced       | Mother diagnosed with pregnancy induced hypertension on [REDACTED]. On [REDACTED] reported no fetal movements, ultrasound scan: no cardiac activity [REDACTED]: labour induction, macerated stillborn |
|                    | 9                     | 35                            | At delivery       | Spontaneous   | On [REDACTED],the participant presented with High blood pressure.She was admitted for further management and monitoring but on [REDACTED] she developed labor pains and delivered a dead fetus.       |
|                    | 10                    | 37                            | Prior to labor    | Induced       | Normal vertex delivery                                                                                                                                                                                |
|                    | 11                    | 40                            | During labor      | Spontaneous   | The participant reported start experiencing labor pain on [REDACTED]. She went to Pasua health center where she was told that she had both labor pain and a cord prolapse.                            |
| <b>EFV/FTC/TDF</b> | 1                     | 23                            | Prior to labor    |               | Patient performed an ultrasound on [REDACTED] and hydrops fetalis was identified.                                                                                                                     |
|                    | 2                     | 35                            | At delivery       |               | Cesarian section for pre eclampsia on [REDACTED] of a macerated stillborn                                                                                                                             |
|                    | 3                     | 37                            | During labor      | Induced       | HAD CORD PROLAPSE AFTER INDUCTION OF LABOUR AND DELIVERED A STILL BIRTH                                                                                                                               |
|                    | 4                     | 41                            | During labor      | Spontaneous   | Macerated still birth                                                                                                                                                                                 |

Dates were redacted from the above narratives.

**Table S8: Maternal Grade 2 or Higher Adverse Events Post Randomization through 14 Days after Pregnancy Outcome**

|                                                      | DTG+FTC/TAF<br>(N=217) |                 |               |                     |                     | DTG+FTC/TDF<br>(N=215) |                 |               |               |                     | EFV/FTC/TDF<br>(N=211) |                 |               |               |                     |
|------------------------------------------------------|------------------------|-----------------|---------------|---------------------|---------------------|------------------------|-----------------|---------------|---------------|---------------------|------------------------|-----------------|---------------|---------------|---------------------|
|                                                      | 2                      | 3               | 4             | 5                   | Total               | 2                      | 3               | 4             | 5             | Total               | 2                      | 3               | 4             | 5             | Total               |
| <b>Overall</b>                                       | <b>6 (3%)</b>          | <b>42 (19%)</b> | <b>2 (1%)</b> | <b>1 (&lt;0.5%)</b> | <b>51 (24%)</b>     | <b>9 (4%)</b>          | <b>50 (23%)</b> | <b>6 (3%)</b> | <b>0 (0%)</b> | <b>65 (30%)</b>     | <b>7 (3%)</b>          | <b>44 (21%)</b> | <b>3 (1%)</b> | <b>0 (0%)</b> | <b>54 (26%)</b>     |
| Blood and lymphatic system disorders                 | 0 (0%)                 | 3 (1%)          | 0 (0%)        | 0 (0%)              | <b>3 (1%)</b>       | 1 (<0.5%)              | 1 (<0.5%)       | 1 (<0.5%)     | 0 (0%)        | <b>3 (1%)</b>       | 2 (1%)                 | 2 (1%)          | 1 (<0.5%)     | 0 (0%)        | <b>5 (2%)</b>       |
| Anaemia                                              | 0                      | 0               | 0             | 0                   | <b>0</b>            | 0                      | 0               | 1             | 0             | <b>1</b>            | 1                      | 1               | 1             | 0             | <b>3</b>            |
| Anaemia of pregnancy                                 | 0                      | 3               | 0             | 0                   | <b>3</b>            | 1                      | 2               | 0             | 0             | <b>3</b>            | 1                      | 0               | 0             | 0             | <b>1</b>            |
| Iron deficiency anaemia                              | 0                      | 0               | 0             | 0                   | <b>0</b>            | 0                      | 0               | 0             | 0             | <b>0</b>            | 0                      | 1               | 0             | 0             | <b>1</b>            |
| Cardiac disorders                                    | 0 (0%)                 | 0 (0%)          | 0 (0%)        | 0 (0%)              | <b>0 (0%)</b>       | 0 (0%)                 | 0 (0%)          | 1 (<0.5%)     | 0 (0%)        | <b>1 (&lt;0.5%)</b> | 0 (0%)                 | 0 (0%)          | 0 (0%)        | 0 (0%)        | <b>0 (0%)</b>       |
| Pericardial effusion                                 | 0                      | 0               | 0             | 0                   | <b>0</b>            | 0                      | 0               | 1             | 0             | <b>1</b>            | 0                      | 0               | 0             | 0             | <b>0</b>            |
| Eye disorders                                        | 1 (<0.5%)              | 0 (0%)          | 0 (0%)        | 0 (0%)              | <b>1 (&lt;0.5%)</b> | 0 (0%)                 | 0 (0%)          | 0 (0%)        | 0 (0%)        | <b>0 (0%)</b>       | 0 (0%)                 | 0 (0%)          | 0 (0%)        | 0 (0%)        | <b>0 (0%)</b>       |
| Vision blurred                                       | 1                      | 0               | 0             | 0                   | <b>1</b>            | 0                      | 0               | 0             | 0             | <b>0</b>            | 0                      | 0               | 0             | 0             | <b>0</b>            |
| Gastrointestinal disorders                           | 1 (<0.5%)              | 1 (<0.5%)       | 0 (0%)        | 0 (0%)              | <b>2 (1%)</b>       | 0 (0%)                 | 0 (0%)          | 0 (0%)        | 0 (0%)        | <b>0 (0%)</b>       | 1 (<0.5%)              | 0 (0%)          | 0 (0%)        | 0 (0%)        | <b>1 (&lt;0.5%)</b> |
| Abdominal pain lower                                 | 0                      | 0               | 0             | 0                   | <b>0</b>            | 0                      | 0               | 0             | 0             | <b>0</b>            | 1                      | 0               | 0             | 0             | <b>1</b>            |
| Diarrhoea                                            | 0                      | 1               | 0             | 0                   | <b>1</b>            | 0                      | 0               | 0             | 0             | <b>0</b>            | 0                      | 0               | 0             | 0             | <b>0</b>            |
| Ileus paralytic                                      | 1                      | 0               | 0             | 0                   | <b>1</b>            | 0                      | 0               | 0             | 0             | <b>0</b>            | 0                      | 0               | 0             | 0             | <b>0</b>            |
| General disorders and administration site conditions | 2 (1%)                 | 0 (0%)          | 0 (0%)        | 0 (0%)              | <b>2 (1%)</b>       | 0 (0%)                 | 0 (0%)          | 0 (0%)        | 0 (0%)        | <b>0 (0%)</b>       | 1 (<0.5%)              | 0 (0%)          | 0 (0%)        | 0 (0%)        | <b>1 (&lt;0.5%)</b> |
| Oedema peripheral                                    | 2                      | 0               | 0             | 0                   | <b>2</b>            | 0                      | 0               | 0             | 0             | <b>0</b>            | 0                      | 0               | 0             | 0             | <b>0</b>            |
| Pyrexia                                              | 0                      | 0               | 0             | 0                   | <b>0</b>            | 0                      | 0               | 0             | 0             | <b>0</b>            | 1                      | 0               | 0             | 0             | <b>1</b>            |
| Immune system disorders                              | 0 (0%)                 | 0 (0%)          | 0 (0%)        | 0 (0%)              | <b>0 (0%)</b>       | 1 (<0.5%)              | 0 (0%)          | 0 (0%)        | 0 (0%)        | <b>1 (&lt;0.5%)</b> | 1 (<0.5%)              | 0 (0%)          | 0 (0%)        | 0 (0%)        | <b>1 (&lt;0.5%)</b> |
| Hypersensitivity                                     | 0                      | 0               | 0             | 0                   | <b>0</b>            | 1                      | 0               | 0             | 0             | <b>1</b>            | 0                      | 0               | 0             | 0             | <b>0</b>            |
| Immune reconstitution inflammatory syndrome          | 0                      | 0               | 0             | 0                   | <b>0</b>            | 0                      | 0               | 0             | 0             | <b>0</b>            | 1                      | 0               | 0             | 0             | <b>1</b>            |
| Infections and infestations                          | 4 (2%)                 | 4 (2%)          | 0 (0%)        | 1 (<0.5%)           | <b>9 (4%)</b>       | 1 (<0.5%)              | 5 (2%)          | 0 (0%)        | 0 (0%)        | <b>6 (3%)</b>       | 1 (<0.5%)              | 8 (4%)          | 0 (0%)        | 0 (0%)        | <b>9 (4%)</b>       |
| Amniotic cavity infection                            | 1                      | 0               | 0             | 0                   | <b>1</b>            | 0                      | 0               | 0             | 0             | <b>0</b>            | 0                      | 2               | 0             | 0             | <b>2</b>            |
| Gastroenteritis                                      | 0                      | 2               | 0             | 0                   | <b>2</b>            | 0                      | 0               | 0             | 0             | <b>0</b>            | 0                      | 0               | 0             | 0             | <b>0</b>            |
| Impetigo                                             | 1                      | 0               | 0             | 0                   | <b>1</b>            | 1                      | 0               | 0             | 0             | <b>1</b>            | 0                      | 0               | 0             | 0             | <b>0</b>            |
| Malaria                                              | 0                      | 0               | 0             | 0                   | <b>0</b>            | 0                      | 0               | 0             | 0             | <b>0</b>            | 0                      | 1               | 0             | 0             | <b>1</b>            |
| Peritonitis                                          | 0                      | 1               | 0             | 0                   | <b>1</b>            | 0                      | 0               | 0             | 0             | <b>0</b>            | 0                      | 0               | 0             | 0             | <b>0</b>            |
| Pneumonia                                            | 0                      | 0               | 0             | 0                   | <b>0</b>            | 0                      | 0               | 0             | 0             | <b>0</b>            | 0                      | 1               | 0             | 0             | <b>1</b>            |
| Postoperative wound infection                        | 1                      | 0               | 0             | 0                   | <b>1</b>            | 0                      | 2               | 0             | 0             | <b>2</b>            | 1                      | 0               | 0             | 0             | <b>1</b>            |
| Postpartum sepsis                                    | 0                      | 1               | 0             | 1                   | <b>2</b>            | 0                      | 0               | 0             | 0             | <b>0</b>            | 0                      | 1               | 0             | 0             | <b>1</b>            |
| Pyelonephritis                                       | 0                      | 0               | 0             | 0                   | <b>0</b>            | 0                      | 0               | 0             | 0             | <b>0</b>            | 0                      | 1               | 0             | 0             | <b>1</b>            |

|                                                                     | DTG+FTC/TAF<br>(N=217) |           |           |        |                     | DTG+FTC/TDF<br>(N=215) |          |        |        |                     | EFV/FTC/TDF<br>(N=211) |           |        |        |                     |
|---------------------------------------------------------------------|------------------------|-----------|-----------|--------|---------------------|------------------------|----------|--------|--------|---------------------|------------------------|-----------|--------|--------|---------------------|
|                                                                     | 2                      | 3         | 4         | 5      | Total               | 2                      | 3        | 4      | 5      | Total               | 2                      | 3         | 4      | 5      | Total               |
| Pyometra                                                            | 0                      | 1         | 0         | 0      | <b>1</b>            | 0                      | 0        | 0      | 0      | <b>0</b>            | 0                      | 0         | 0      | 0      | <b>0</b>            |
| Tonsillitis                                                         | 1                      | 0         | 0         | 0      | <b>1</b>            | 0                      | 0        | 0      | 0      | <b>0</b>            | 0                      | 0         | 0      | 0      | <b>0</b>            |
| Urinary tract infection                                             | 1                      | 1         | 0         | 0      | <b>2</b>            | 0                      | 3        | 0      | 0      | <b>3</b>            | 1                      | 2         | 0      | 0      | <b>3</b>            |
| Vaginal infection                                                   | 0                      | 0         | 0         | 0      | <b>0</b>            | 0                      | 0        | 0      | 0      | <b>0</b>            | 1                      | 0         | 0      | 0      | <b>1</b>            |
| Wound sepsis                                                        | 0                      | 1         | 0         | 0      | <b>1</b>            | 1                      | 0        | 0      | 0      | <b>1</b>            | 0                      | 0         | 0      | 0      | <b>0</b>            |
| Injury, poisoning and procedural complications                      | 0 (0%)                 | 0 (0%)    | 1 (<0.5%) | 0 (0%) | <b>1 (&lt;0.5%)</b> | 1 (<0.5%)              | 0 (0%)   | 0 (0%) | 0 (0%) | <b>1 (&lt;0.5%)</b> | 0 (0%)                 | 0 (0%)    | 0 (0%) | 0 (0%) | <b>0 (0%)</b>       |
| Uterine rupture                                                     | 0                      | 0         | 1         | 0      | <b>1</b>            | 0                      | 0        | 0      | 0      | <b>0</b>            | 0                      | 0         | 0      | 0      | <b>0</b>            |
| Vaginal laceration                                                  | 0                      | 0         | 0         | 0      | <b>0</b>            | 1                      | 0        | 0      | 0      | <b>1</b>            | 0                      | 0         | 0      | 0      | <b>0</b>            |
| Investigations                                                      | 0 (0%)                 | 8 (4%)    | 1 (<0.5%) | 0 (0%) | <b>9 (4%)</b>       | 1 (<0.5%)              | 17 (8%)  | 3 (1%) | 0 (0%) | <b>21 (10%)</b>     | 0 (0%)                 | 12 (6%)   | 3 (1%) | 0 (0%) | <b>15 (7%)</b>      |
| Aspartate aminotransferase increased                                | 0                      | 0         | 0         | 0      | <b>0</b>            | 0                      | 1        | 0      | 0      | <b>1</b>            | 0                      | 0         | 1      | 0      | <b>1</b>            |
| Blood pressure increased                                            | 0                      | 2         | 0         | 0      | <b>2</b>            | 0                      | 0        | 1      | 0      | <b>1</b>            | 0                      | 1         | 0      | 0      | <b>1</b>            |
| Creatinine renal clearance decreased                                | 0                      | 1         | 0         | 0      | <b>1</b>            | 0                      | 1        | 0      | 0      | <b>1</b>            | 0                      | 2         | 0      | 0      | <b>2</b>            |
| Haemoglobin decreased                                               | 0                      | 6         | 1         | 0      | <b>7</b>            | 0                      | 15       | 2      | 0      | <b>17</b>           | 0                      | 9         | 2      | 0      | <b>11</b>           |
| Weight decreased                                                    | 0                      | 0         | 0         | 0      | <b>0</b>            | 1                      | 0        | 0      | 0      | <b>1</b>            | 0                      | 0         | 0      | 0      | <b>0</b>            |
| Metabolism and nutrition disorders                                  | 0 (0%)                 | 0 (0%)    | 0 (0%)    | 0 (0%) | <b>0 (0%)</b>       | 0 (0%)                 | 0 (0%)   | 0 (0%) | 0 (0%) | <b>0 (0%)</b>       | 0 (0%)                 | 1 (<0.5%) | 0 (0%) | 0 (0%) | <b>1 (&lt;0.5%)</b> |
| Hypoglycaemia                                                       | 0                      | 0         | 0         | 0      | <b>0</b>            | 0                      | 0        | 0      | 0      | <b>0</b>            | 0                      | 1         | 0      | 0      | <b>1</b>            |
| Musculoskeletal and connective tissue disorders                     | 0 (0%)                 | 0 (0%)    | 0 (0%)    | 0 (0%) | <b>0 (0%)</b>       | 0 (0%)                 | 0 (0%)   | 0 (0%) | 0 (0%) | <b>0 (0%)</b>       | 1 (<0.5%)              | 0 (0%)    | 0 (0%) | 0 (0%) | <b>1 (&lt;0.5%)</b> |
| Back pain                                                           | 0                      | 0         | 0         | 0      | <b>0</b>            | 0                      | 0        | 0      | 0      | <b>0</b>            | 1                      | 0         | 0      | 0      | <b>1</b>            |
| Neoplasms benign, malignant and unspecified (incl cysts and polyps) | 0 (0%)                 | 0 (0%)    | 0 (0%)    | 0 (0%) | <b>0 (0%)</b>       | 1 (<0.5%)              | 0 (0%)   | 0 (0%) | 0 (0%) | <b>1 (&lt;0.5%)</b> | 0 (0%)                 | 0 (0%)    | 0 (0%) | 0 (0%) | <b>0 (0%)</b>       |
| Anogenital warts                                                    | 0                      | 0         | 0         | 0      | <b>0</b>            | 1                      | 0        | 0      | 0      | <b>1</b>            | 0                      | 0         | 0      | 0      | <b>0</b>            |
| Nervous system disorders                                            | 1 (<0.5%)              | 1 (<0.5%) | 0 (0%)    | 0 (0%) | <b>2 (1%)</b>       | 0 (0%)                 | 0 (0%)   | 0 (0%) | 0 (0%) | <b>0 (0%)</b>       | 0 (0%)                 | 0 (0%)    | 0 (0%) | 0 (0%) | <b>0 (0%)</b>       |
| Headache                                                            | 1                      | 0         | 0         | 0      | <b>1</b>            | 0                      | 0        | 0      | 0      | <b>0</b>            | 0                      | 0         | 0      | 0      | <b>0</b>            |
| Presyncope                                                          | 0                      | 1         | 0         | 0      | <b>1</b>            | 0                      | 0        | 0      | 0      | <b>0</b>            | 0                      | 0         | 0      | 0      | <b>0</b>            |
| Pregnancy, puerperium and perinatal conditions                      | 1 (<0.5%)              | 29 (13%)  | 1 (<0.5%) | 0 (0%) | <b>31 (14%)</b>     | 2 (1%)                 | 30 (14%) | 4 (2%) | 0 (0%) | <b>36 (17%)</b>     | 1 (<0.5%)              | 28 (13%)  | 0 (0%) | 0 (0%) | <b>29 (14%)</b>     |
| Abortion spontaneous                                                | 0                      | 1         | 0         | 0      | <b>1</b>            | 0                      | 1        | 0      | 0      | <b>1</b>            | 0                      | 0         | 0      | 0      | <b>0</b>            |
| Abortion threatened                                                 | 0                      | 0         | 0         | 0      | <b>0</b>            | 0                      | 1        | 0      | 0      | <b>1</b>            | 0                      | 0         | 0      | 0      | <b>0</b>            |
| Cervix dystocia                                                     | 0                      | 0         | 0         | 0      | <b>0</b>            | 0                      | 0        | 0      | 0      | <b>0</b>            | 0                      | 1         | 0      | 0      | <b>1</b>            |
| Eclampsia                                                           | 0                      | 1         | 0         | 0      | <b>1</b>            | 0                      | 1        | 0      | 0      | <b>1</b>            | 0                      | 0         | 0      | 0      | <b>0</b>            |
| Failed induction of labour                                          | 0                      | 0         | 0         | 0      | <b>0</b>            | 0                      | 0        | 0      | 0      | <b>0</b>            | 0                      | 1         | 0      | 0      | <b>1</b>            |
| Failed trial of labour                                              | 0                      | 1         | 0         | 0      | <b>1</b>            | 0                      | 0        | 0      | 0      | <b>0</b>            | 0                      | 0         | 0      | 0      | <b>0</b>            |
| False labour                                                        | 0                      | 0         | 0         | 0      | <b>0</b>            | 0                      | 2        | 0      | 0      | <b>2</b>            | 0                      | 0         | 0      | 0      | <b>0</b>            |

|                                        | DTG+FTC/TAF<br>(N=217) |           |        |        |        | DTG+FTC/TDF<br>(N=215) |        |        |        |        | EFV/FTC/TDF<br>(N=211) |        |        |        |        |
|----------------------------------------|------------------------|-----------|--------|--------|--------|------------------------|--------|--------|--------|--------|------------------------|--------|--------|--------|--------|
|                                        | 2                      | 3         | 4      | 5      | Total  | 2                      | 3      | 4      | 5      | Total  | 2                      | 3      | 4      | 5      | Total  |
| Foetal death                           | 0                      | 5         | 1      | 0      | 6      | 0                      | 7      | 0      | 0      | 7      | 0                      | 1      | 0      | 0      | 1      |
| Foetal distress syndrome               | 0                      | 2         | 0      | 0      | 2      | 0                      | 2      | 0      | 0      | 2      | 0                      | 4      | 0      | 0      | 4      |
| Foetal growth restriction              | 0                      | 0         | 0      | 0      | 0      | 2                      | 0      | 0      | 0      | 2      | 0                      | 0      | 0      | 0      | 0      |
| Foetal hypokinesia                     | 0                      | 1         | 0      | 0      | 1      | 0                      | 0      | 0      | 0      | 0      | 0                      | 0      | 0      | 0      | 0      |
| Gestational diabetes                   | 0                      | 0         | 0      | 0      | 0      | 0                      | 1      | 0      | 0      | 1      | 0                      | 0      | 0      | 0      | 0      |
| Gestational hypertension               | 1                      | 5         | 0      | 0      | 6      | 0                      | 3      | 2      | 0      | 5      | 0                      | 7      | 0      | 0      | 7      |
| Haemorrhage in pregnancy               | 0                      | 2         | 0      | 0      | 2      | 0                      | 1      | 0      | 0      | 1      | 0                      | 2      | 0      | 0      | 2      |
| Hydrops foetalis                       | 0                      | 0         | 0      | 0      | 0      | 0                      | 0      | 0      | 0      | 0      | 0                      | 1      | 0      | 0      | 1      |
| Hyperemesis gravidarum                 | 0                      | 1         | 0      | 0      | 1      | 0                      | 0      | 0      | 0      | 0      | 0                      | 0      | 0      | 0      | 0      |
| Imminent abortion                      | 0                      | 0         | 0      | 0      | 0      | 0                      | 1      | 0      | 0      | 1      | 0                      | 0      | 0      | 0      | 0      |
| Large for dates baby                   | 0                      | 1         | 0      | 0      | 1      | 0                      | 0      | 0      | 0      | 0      | 0                      | 0      | 0      | 0      | 0      |
| Meconium in amniotic fluid             | 0                      | 0         | 0      | 0      | 0      | 0                      | 0      | 0      | 0      | 0      | 0                      | 1      | 0      | 0      | 1      |
| Morning sickness                       | 0                      | 0         | 0      | 0      | 0      | 0                      | 0      | 0      | 0      | 0      | 0                      | 1      | 0      | 0      | 1      |
| Oligohydramnios                        | 0                      | 0         | 0      | 0      | 0      | 1                      | 3      | 0      | 0      | 4      | 1                      | 2      | 0      | 0      | 3      |
| Placenta praevia                       | 0                      | 0         | 0      | 0      | 0      | 0                      | 0      | 0      | 0      | 0      | 0                      | 1      | 0      | 0      | 1      |
| Postpartum haemorrhage                 | 0                      | 1         | 0      | 0      | 1      | 0                      | 0      | 1      | 0      | 1      | 0                      | 2      | 0      | 0      | 2      |
| Pre-eclampsia                          | 0                      | 4         | 0      | 0      | 4      | 1                      | 2      | 0      | 0      | 3      | 0                      | 1      | 0      | 0      | 1      |
| Premature delivery                     | 1                      | 2         | 0      | 0      | 3      | 0                      | 1      | 0      | 0      | 1      | 0                      | 1      | 0      | 0      | 1      |
| Premature rupture of membranes         | 0                      | 3         | 0      | 0      | 3      | 0                      | 2      | 0      | 0      | 2      | 0                      | 1      | 0      | 0      | 1      |
| Premature separation of placenta       | 0                      | 0         | 0      | 0      | 0      | 0                      | 1      | 1      | 0      | 2      | 0                      | 0      | 0      | 0      | 0      |
| Preterm premature rupture of membranes | 0                      | 2         | 0      | 0      | 2      | 1                      | 3      | 0      | 0      | 4      | 1                      | 4      | 0      | 0      | 5      |
| Prolonged labour                       | 0                      | 0         | 0      | 0      | 0      | 0                      | 1      | 0      | 0      | 1      | 0                      | 1      | 0      | 0      | 1      |
| Prolonged pregnancy                    | 0                      | 1         | 0      | 0      | 1      | 0                      | 0      | 0      | 0      | 0      | 0                      | 0      | 0      | 0      | 0      |
| Prolonged rupture of membranes         | 0                      | 0         | 0      | 0      | 0      | 0                      | 2      | 0      | 0      | 2      | 0                      | 0      | 0      | 0      | 0      |
| Stillbirth                             | 0                      | 1         | 0      | 0      | 1      | 0                      | 2      | 0      | 0      | 2      | 0                      | 3      | 0      | 0      | 3      |
| Threatened labour                      | 0                      | 0         | 0      | 0      | 0      | 0                      | 2      | 0      | 0      | 2      | 0                      | 0      | 0      | 0      | 0      |
| Umbilical cord around neck             | 0                      | 1         | 0      | 0      | 1      | 0                      | 0      | 0      | 0      | 0      | 0                      | 0      | 0      | 0      | 0      |
| Umbilical cord prolapse                | 0                      | 1         | 0      | 0      | 1      | 0                      | 1      | 0      | 0      | 1      | 0                      | 0      | 0      | 0      | 0      |
| Psychiatric disorders                  | 2 (1%)                 | 1 (<0.5%) | 0 (0%) | 0 (0%) | 3 (1%) | 0 (0%)                 | 0 (0%) | 0 (0%) | 0 (0%) | 0 (0%) | 2 (1%)                 | 0 (0%) | 0 (0%) | 0 (0%) | 2 (1%) |
| Alcoholism                             | 0                      | 1         | 0      | 0      | 1      | 0                      | 0      | 0      | 0      | 0      | 0                      | 0      | 0      | 0      | 0      |
| Depression                             | 1                      | 0         | 0      | 0      | 1      | 0                      | 0      | 0      | 0      | 0      | 0                      | 0      | 0      | 0      | 0      |
| Insomnia                               | 1                      | 0         | 0      | 0      | 1      | 0                      | 0      | 0      | 0      | 0      | 1                      | 0      | 0      | 0      | 1      |
| Irritability                           | 0                      | 0         | 0      | 0      | 0      | 0                      | 0      | 0      | 0      | 0      | 1                      | 0      | 0      | 0      | 1      |

|                                                 | DTG+FTC/TAF<br>(N=217) |           |        |        |                     | DTG+FTC/TDF<br>(N=215) |           |           |        |                     | EFV/FTC/TDF<br>(N=211) |           |        |        |                     |
|-------------------------------------------------|------------------------|-----------|--------|--------|---------------------|------------------------|-----------|-----------|--------|---------------------|------------------------|-----------|--------|--------|---------------------|
|                                                 | 2                      | 3         | 4      | 5      | Total               | 2                      | 3         | 4         | 5      | Total               | 2                      | 3         | 4      | 5      | Total               |
| Renal and urinary disorders                     | 0 (0%)                 | 0 (0%)    | 0 (0%) | 0 (0%) | <b>0 (0%)</b>       | 0 (0%)                 | 0 (0%)    | 0 (0%)    | 0 (0%) | <b>0 (0%)</b>       | 1 (<0.5%)              | 0 (0%)    | 0 (0%) | 0 (0%) | <b>1 (&lt;0.5%)</b> |
| Glycosuria during pregnancy                     | 0                      | 0         | 0      | 0      | <b>0</b>            | 0                      | 0         | 0         | 0      | <b>0</b>            | 1                      | 0         | 0      | 0      | <b>1</b>            |
| Reproductive system and breast disorders        | 0 (0%)                 | 1 (<0.5%) | 0 (0%) | 0 (0%) | <b>1 (&lt;0.5%)</b> | 0 (0%)                 | 0 (0%)    | 0 (0%)    | 0 (0%) | <b>0 (0%)</b>       | 1 (<0.5%)              | 0 (0%)    | 0 (0%) | 0 (0%) | <b>1 (&lt;0.5%)</b> |
| Vaginal discharge                               | 0                      | 0         | 0      | 0      | <b>0</b>            | 0                      | 0         | 0         | 0      | <b>0</b>            | 1                      | 0         | 0      | 0      | <b>1</b>            |
| Vaginal haemorrhage                             | 0                      | 1         | 0      | 0      | <b>1</b>            | 0                      | 0         | 0         | 0      | <b>0</b>            | 0                      | 0         | 0      | 0      | <b>0</b>            |
| Respiratory, thoracic and mediastinal disorders | 0 (0%)                 | 0 (0%)    | 0 (0%) | 0 (0%) | <b>0 (0%)</b>       | 0 (0%)                 | 0 (0%)    | 1 (<0.5%) | 0 (0%) | <b>1 (&lt;0.5%)</b> | 0 (0%)                 | 0 (0%)    | 0 (0%) | 0 (0%) | <b>0 (0%)</b>       |
| Cough                                           | 0                      | 0         | 0      | 0      | <b>0</b>            | 0                      | 1         | 0         | 0      | <b>1</b>            | 0                      | 0         | 0      | 0      | <b>0</b>            |
| Dyspnoea                                        | 0                      | 0         | 0      | 0      | <b>0</b>            | 0                      | 0         | 1         | 0      | <b>1</b>            | 0                      | 0         | 0      | 0      | <b>0</b>            |
| Skin and subcutaneous tissue disorders          | 2 (1%)                 | 0 (0%)    | 0 (0%) | 0 (0%) | <b>2 (1%)</b>       | 5 (2%)                 | 0 (0%)    | 0 (0%)    | 0 (0%) | <b>5 (2%)</b>       | 1 (<0.5%)              | 0 (0%)    | 0 (0%) | 0 (0%) | <b>1 (&lt;0.5%)</b> |
| Acne                                            | 0                      | 0         | 0      | 0      | <b>0</b>            | 1                      | 0         | 0         | 0      | <b>1</b>            | 0                      | 0         | 0      | 0      | <b>0</b>            |
| Rash                                            | 1                      | 0         | 0      | 0      | <b>1</b>            | 3                      | 0         | 0         | 0      | <b>3</b>            | 1                      | 0         | 0      | 0      | <b>1</b>            |
| Rash maculo-papular                             | 0                      | 0         | 0      | 0      | <b>0</b>            | 1                      | 0         | 0         | 0      | <b>1</b>            | 0                      | 0         | 0      | 0      | <b>0</b>            |
| Urticaria                                       | 1                      | 0         | 0      | 0      | <b>1</b>            | 0                      | 0         | 0         | 0      | <b>0</b>            | 0                      | 0         | 0      | 0      | <b>0</b>            |
| Social circumstances                            | 0 (0%)                 | 0 (0%)    | 0 (0%) | 0 (0%) | <b>0 (0%)</b>       | 0 (0%)                 | 1 (<0.5%) | 0 (0%)    | 0 (0%) | <b>1 (&lt;0.5%)</b> | 0 (0%)                 | 0 (0%)    | 0 (0%) | 0 (0%) | <b>0 (0%)</b>       |
| Physical assault                                | 0                      | 0         | 0      | 0      | <b>0</b>            | 0                      | 1         | 0         | 0      | <b>1</b>            | 0                      | 0         | 0      | 0      | <b>0</b>            |
| Surgical and medical procedures                 | 0 (0%)                 | 1 (<0.5%) | 0 (0%) | 0 (0%) | <b>1 (&lt;0.5%)</b> | 0 (0%)                 | 0 (0%)    | 0 (0%)    | 0 (0%) | <b>0 (0%)</b>       | 0 (0%)                 | 0 (0%)    | 0 (0%) | 0 (0%) | <b>0 (0%)</b>       |
| Caesarean section                               | 0                      | 1         | 0      | 0      | <b>1</b>            | 0                      | 0         | 0         | 0      | <b>0</b>            | 0                      | 0         | 0      | 0      | <b>0</b>            |
| Vascular disorders                              | 1 (<0.5%)              | 2 (1%)    | 0 (0%) | 0 (0%) | <b>3 (1%)</b>       | 1 (<0.5%)              | 1 (<0.5%) | 0 (0%)    | 0 (0%) | <b>2 (1%)</b>       | 1 (<0.5%)              | 1 (<0.5%) | 0 (0%) | 0 (0%) | <b>2 (1%)</b>       |
| Deep vein thrombosis                            | 0                      | 0         | 0      | 0      | <b>0</b>            | 0                      | 0         | 0         | 0      | <b>0</b>            | 0                      | 1         | 0      | 0      | <b>1</b>            |
| Essential hypertension                          | 0                      | 1         | 0      | 0      | <b>1</b>            | 0                      | 0         | 0         | 0      | <b>0</b>            | 0                      | 0         | 0      | 0      | <b>0</b>            |
| Hypertension                                    | 1                      | 0         | 0      | 0      | <b>1</b>            | 0                      | 1         | 0         | 0      | <b>1</b>            | 1                      | 0         | 0      | 0      | <b>1</b>            |
| Hypotension                                     | 0                      | 1         | 0      | 0      | <b>1</b>            | 1                      | 0         | 0         | 0      | <b>1</b>            | 0                      | 0         | 0      | 0      | <b>0</b>            |

Women who experienced multiple events are reported once at the highest grade in the 'Overall' row. Similarly, women who experienced multiple grade 2 or higher events within each row are reported once at the highest grade of that event.

Overall, 195 creatinine clearance events and 167 creatinine events were excluded from the above table because they did not meet the criteria for a grade 2 or above adverse event based on absolute lab values.



**Table S9: Maternal Safety Outcome Measure through 14 Days after Pregnancy Outcome by Treatment Group**

| Outcome                                | Experienced Outcome | Treatment Group     |                     |                     | Total               | P-value <sup>2</sup>             |                                  |                                  |
|----------------------------------------|---------------------|---------------------|---------------------|---------------------|---------------------|----------------------------------|----------------------------------|----------------------------------|
|                                        |                     | DTG+FTC/TA<br>F     | DTG+FTC/TD<br>F     | EFV/FTC/TDF         |                     | DTG+FTC/TAF<br>vs<br>DTG+FTC/TDF | DTG+FTC/TDF<br>vs<br>EFV/FTC/TDF | DTG+FTC/TAF<br>vs<br>EFV/FTC/TDF |
|                                        |                     | N (%)               | N (%)               | N (%)               |                     | N (%)                            |                                  |                                  |
| Safety Outcome Measure <sup>1</sup>    | Yes                 | 45 (20.7%)          | 56 (26.0%)          | 47 (22.3%)          | 148 (23.0%)         | 0.27                             | 0.59                             | 0.58                             |
|                                        | No                  | 172 (79.3%)         | 159 (74.0%)         | 164 (77.7%)         | 495 (77.0%)         |                                  |                                  |                                  |
|                                        | <b>Total</b>        | <b>217 (100.0%)</b> | <b>215 (100.0%)</b> | <b>211 (100.0%)</b> | <b>643 (100.0%)</b> |                                  |                                  |                                  |
| Early Study Discontinuation as Failure | Yes                 | 47 (21.7%)          | 58 (27.0%)          | 48 (22.7%)          | 153 (23.8%)         | 0.28                             | 0.54                             | 0.65                             |
|                                        | No                  | 170 (78.3%)         | 157 (73.0%)         | 163 (77.3%)         | 490 (76.2%)         |                                  |                                  |                                  |
|                                        | <b>Total</b>        | <b>217 (100.0%)</b> | <b>215 (100.0%)</b> | <b>211 (100.0%)</b> | <b>643 (100.0%)</b> |                                  |                                  |                                  |

<sup>1</sup>The safety outcome measure was defined as experiencing at least one grade 3 or higher adverse event through 14 days after pregnancy outcome.

<sup>2</sup>Pairwise log-rank p-value between the two indicated treatment groups.

**Table S10: Secondary Analysis Comparisons of Maternal Renal Labs at Delivery**

| Lab                           | Treatment Group Mean (SD) |                |                | Pairwise Comparisons      | Unadjusted               |                      | Adjusted <sup>2</sup>    |                      |
|-------------------------------|---------------------------|----------------|----------------|---------------------------|--------------------------|----------------------|--------------------------|----------------------|
|                               | DTG+FTC/TAF               | DTG+FTC/TDF    | EFV/FTC/TDF    |                           | Mean Difference (95% CI) | P-value <sup>1</sup> | Mean Difference (95% CI) | P-value <sup>2</sup> |
| Creatinine (mg/dL)            | 0.64 (0.1)                | 0.68 (0.1)     |                | DTG+FTC/TAF - DTG+FTC/TDF | -0.03 (-0.06, -0.01)     | 0.018                | -0.03 (-0.06, -0.01)     | 0.015                |
|                               |                           | 0.68 (0.1)     | 0.57 (0.1)     | DTG+FTC/TDF - EFV/FTC/TDF | 0.11 (0.08, 0.14)        | < 0.001              | 0.11 (0.08, 0.14)        | < 0.001              |
|                               | 0.64 (0.1)                |                | 0.57 (0.1)     | DTG+FTC/TAF - EFV/FTC/TDF | 0.08 (0.05, 0.10)        | < 0.001              | 0.08 (0.05, 0.10)        | < 0.001              |
| Creatinine Clearance (mL/min) | 148.51 (51.26)            | 134.89 (45.76) |                | DTG+FTC/TAF - DTG+FTC/TDF | 13.6 (4.1, 23.1)         | 0.005                | 13.8 (4.3, 23.3)         | 0.005                |
|                               |                           | 134.89 (45.76) | 155.26 (48.21) | DTG+FTC/TDF - EFV/FTC/TDF | -20.4 (-29.6, -11.2)     | < 0.001              | -20.4 (-29.6, -11.2)     | < 0.001              |
|                               | 148.51 (51.26)            |                | 155.26 (48.21) | DTG+FTC/TAF - EFV/FTC/TDF | -6.8 (-16.5, 3.0)        | 0.18                 | -6.7 (-16.5, 3.1)        | 0.18                 |

<sup>1</sup>T-test between the two indicated means.

<sup>2</sup>Adjusted by gestational age at delivery as a covariate in a linear regression model.

**Table S11: Average Weekly Maternal Antepartum Weight Gain**

|                                                |                           | <b>Intent to Treat</b>   |                | <b>Per Protocol</b>      |                |
|------------------------------------------------|---------------------------|--------------------------|----------------|--------------------------|----------------|
|                                                |                           | <b>Estimate (95% CI)</b> | <b>P-Value</b> | <b>Estimate (95% CI)</b> | <b>P-Value</b> |
| <b>Mean Weight Change Per Week (kg)</b>        | DTG+FTC/TAF               | 0.378 (0.343, 0.412)     |                | 0.377 (0.343, 0.411)     |                |
|                                                | DTG+FTC/TDF               | 0.319 (0.291, 0.348)     |                | 0.319 (0.290, 0.348)     |                |
|                                                | EFV/FTC/TDF               | 0.291 (0.260, 0.322)     |                | 0.284 (0.253, 0.316)     |                |
| <b>Difference in Weekly Weight Change (kg)</b> | DTG+FTC/TAF - DTG+FTC/TDF | 0.058 (0.013, 0.103)     | 0.011          | 0.058 (0.013, 0.103)     | 0.011          |
|                                                | DTG+FTC/TDF - EFV/FTC/TDF | 0.028 (-0.014, 0.070)    | 0.19           | 0.034 (-0.008, 0.077)    | 0.11           |
|                                                | DTG+FTC/TAF - EFV/FTC/TDF | 0.086 (0.040, 0.133)     | < 0.001        | 0.092 (0.046, 0.139)     | < 0.001        |

**Table S12: Sensitivity Analysis of Average Weekly Maternal Antepartum Weight Gain**

|                                                |                           | Intent to Treat       |         | Per Protocol*         |         |
|------------------------------------------------|---------------------------|-----------------------|---------|-----------------------|---------|
|                                                |                           | Estimate (95% CI)     | P-Value | Estimate (95% CI)     | P-Value |
| <b>Mean Weight Change Per Week (kg)</b>        | DTG+FTC/TAF               | 0.371 (0.337, 0.405)  |         | 0.369 (0.337, 0.401)  |         |
|                                                | DTG+FTC/TDF               | 0.332 (0.299, 0.365)  |         | 0.323 (0.293, 0.352)  |         |
|                                                | EFV/FTC/TDF               | 0.289 (0.258, 0.320)  |         | 0.283 (0.252, 0.315)  |         |
| <b>Difference in Weekly Weight Change (kg)</b> | DTG+FTC/TAF - DTG+FTC/TDF | 0.037 (-0.010, 0.085) | 0.12    | 0.044 (0.000, 0.087)  | 0.049   |
|                                                | DTG+FTC/TDF - EFV/FTC/TDF | 0.043 (-0.003, 0.088) | 0.065   | 0.040 (-0.004, 0.083) | 0.073   |
|                                                | DTG+FTC/TAF - EFV/FTC/TDF | 0.083 (0.037, 0.128)  | < 0.001 | 0.086 (0.041, 0.132)  | < 0.001 |

This sensitivity analysis of antepartum weight gain used inverse probability weighting to standardize treatment groups to the EFV group by gestational age.

\*The per protocol analysis excluded women at 28 weeks antepartum, because no women in the EFV group were on treatment at week 28.

**Table S13: Average Weekly Maternal Antepartum Weight Gain by Country**

|                                            | Country       | Treatment group |                             |             |                             |             |                             |
|--------------------------------------------|---------------|-----------------|-----------------------------|-------------|-----------------------------|-------------|-----------------------------|
|                                            |               | DTG+FTC/TAF     |                             | DTG+FTC/TDF |                             | EFV/FTC/TDF |                             |
|                                            |               | N               | Estimate (95% CI)           | N           | Estimate (95% CI)           | N           | Estimate (95% CI)           |
| <b>Average Weight Change Per Week (kg)</b> | Botswana      | 16              | 0.319 (0.226, 0.413)        | 18          | 0.396 (0.269, 0.522)        | 17          | 0.288 (0.204, 0.372)        |
|                                            | South Africa  | 37              | 0.418 (0.352, 0.483)        | 37          | 0.308 (0.259, 0.358)        | 37          | 0.373 (0.288, 0.459)        |
|                                            | Tanzania      | 15              | 0.239 (0.105, 0.372)        | 13          | 0.240 (0.145, 0.335)        | 15          | 0.241 (0.177, 0.306)        |
|                                            | Uganda        | 37              | 0.351 (0.288, 0.415)        | 37          | 0.297 (0.230, 0.365)        | 35          | 0.283 (0.207, 0.359)        |
|                                            | Zimbabwe      | 82              | 0.386 (0.326, 0.446)        | 84          | 0.294 (0.247, 0.340)        | 83          | 0.221 (0.179, 0.263)        |
|                                            | India         | 2               | 0.350 (0.348, 0.351)        | 1           | 0.530 (0.530, 0.530)        | 0           |                             |
|                                            | Thailand      | 5               | 0.451 (0.337, 0.565)        | 4           | 0.493 (0.369, 0.616)        | 6           | 0.405 (0.229, 0.580)        |
|                                            | Brazil        | 21              | 0.413 (0.304, 0.523)        | 19          | 0.331 (0.247, 0.415)        | 17          | 0.348 (0.251, 0.445)        |
|                                            | United States | 2               | 0.150 (0.019, 0.280)        | 2           | 0.380 (0.327, 0.433)        | 0           |                             |
|                                            | <b>Total</b>  | <b>217</b>      | <b>0.378 (0.343, 0.412)</b> | <b>215</b>  | <b>0.319 (0.291, 0.348)</b> | <b>210</b>  | <b>0.291 (0.260, 0.322)</b> |

**Table S14: Infant Grade 2 or Higher Adverse Events Post Randomization through 14 Days after Pregnancy Outcome**

|                                                      | DTG+FTC/TAF<br>(N=208) |                 |               |               |                     | DTG+FTC/TDF<br>(N=202) |                 |               |               |                     | EFV/FTC/TDF<br>(N=207) |                 |               |                |                     |
|------------------------------------------------------|------------------------|-----------------|---------------|---------------|---------------------|------------------------|-----------------|---------------|---------------|---------------------|------------------------|-----------------|---------------|----------------|---------------------|
|                                                      | 2                      | 3               | 4             | 5             | Total               | 2                      | 3               | 4             | 5             | Total               | 2                      | 3               | 4             | 5              | Total               |
| <b>Overall</b>                                       | <b>4 (2%)</b>          | <b>24 (12%)</b> | <b>3 (1%)</b> | <b>2 (1%)</b> | <b>33 (16%)</b>     | <b>3 (1%)</b>          | <b>28 (14%)</b> | <b>2 (1%)</b> | <b>3 (1%)</b> | <b>36 (18%)</b>     | <b>3 (1%)</b>          | <b>26 (13%)</b> | <b>6 (3%)</b> | <b>11 (5%)</b> | <b>46 (22%)</b>     |
| Blood and lymphatic system disorders                 | 1 (<0.5%)              | 0 (0%)          | 0 (0%)        | 0 (0%)        | <b>1 (&lt;0.5%)</b> | 0 (0%)                 | 1 (<0.5%)       | 0 (0%)        | 0 (0%)        | <b>1 (&lt;0.5%)</b> | 0 (0%)                 | 0 (0%)          | 0 (0%)        | 0 (0%)         | <b>0 (0%)</b>       |
| Anaemia neonatal                                     | 1                      | 0               | 0             | 0             | <b>1</b>            | 0                      | 0               | 0             | 0             | <b>0</b>            | 0                      | 0               | 0             | 0              | <b>0</b>            |
| Neutropenia neonatal                                 | 0                      | 0               | 0             | 0             | <b>0</b>            | 0                      | 1               | 0             | 0             | <b>1</b>            | 0                      | 0               | 0             | 0              | <b>0</b>            |
| Congenital, familial and genetic disorders           | 2 (1%)                 | 1 (<0.5%)       | 0 (0%)        | 0 (0%)        | <b>3 (1%)</b>       | 1 (<0.5%)              | 2 (1%)          | 0 (0%)        | 0 (0%)        | <b>3 (1%)</b>       | 2 (1%)                 | 1 (<0.5%)       | 0 (0%)        | 1 (<0.5%)      | <b>4 (2%)</b>       |
| Ankyloglossia congenital                             | 0                      | 0               | 0             | 0             | <b>0</b>            | 0                      | 0               | 0             | 0             | <b>0</b>            | 1                      | 0               | 0             | 0              | <b>1</b>            |
| Congenital hydronephrosis                            | 0                      | 0               | 0             | 0             | <b>0</b>            | 0                      | 1               | 0             | 0             | <b>1</b>            | 0                      | 0               | 0             | 0              | <b>0</b>            |
| Congenital joint malformation                        | 0                      | 0               | 0             | 0             | <b>0</b>            | 1                      | 0               | 0             | 0             | <b>1</b>            | 0                      | 0               | 0             | 0              | <b>0</b>            |
| Congenital syphilis                                  | 0                      | 1               | 0             | 0             | <b>1</b>            | 0                      | 1               | 0             | 0             | <b>1</b>            | 0                      | 1               | 0             | 0              | <b>1</b>            |
| Congenital ureteric anomaly                          | 0                      | 0               | 0             | 0             | <b>0</b>            | 0                      | 1               | 0             | 0             | <b>1</b>            | 0                      | 0               | 0             | 0              | <b>0</b>            |
| Duodenal atresia                                     | 0                      | 0               | 0             | 0             | <b>0</b>            | 0                      | 0               | 0             | 0             | <b>0</b>            | 0                      | 0               | 0             | 1              | <b>1</b>            |
| Naevus flammeus                                      | 1                      | 0               | 0             | 0             | <b>1</b>            | 0                      | 0               | 0             | 0             | <b>0</b>            | 0                      | 0               | 0             | 0              | <b>0</b>            |
| Talipes                                              | 1                      | 0               | 0             | 0             | <b>1</b>            | 0                      | 0               | 0             | 0             | <b>0</b>            | 0                      | 0               | 0             | 0              | <b>0</b>            |
| Trisomy 21                                           | 0                      | 0               | 0             | 0             | <b>0</b>            | 0                      | 0               | 0             | 0             | <b>0</b>            | 1                      | 0               | 0             | 0              | <b>1</b>            |
| Gastrointestinal disorders                           | 0 (0%)                 | 1 (<0.5%)       | 0 (0%)        | 0 (0%)        | <b>1 (&lt;0.5%)</b> | 0 (0%)                 | 1 (<0.5%)       | 0 (0%)        | 0 (0%)        | <b>1 (&lt;0.5%)</b> | 0 (0%)                 | 0 (0%)          | 1 (<0.5%)     | 0 (0%)         | <b>1 (&lt;0.5%)</b> |
| Ileal stenosis                                       | 0                      | 0               | 0             | 0             | <b>0</b>            | 0                      | 0               | 0             | 0             | <b>0</b>            | 0                      | 0               | 1             | 0              | <b>1</b>            |
| Infantile vomiting                                   | 0                      | 0               | 0             | 0             | <b>0</b>            | 0                      | 1               | 0             | 0             | <b>1</b>            | 0                      | 0               | 0             | 0              | <b>0</b>            |
| Umbilical hernia                                     | 0                      | 1               | 0             | 0             | <b>1</b>            | 0                      | 0               | 0             | 0             | <b>0</b>            | 0                      | 0               | 0             | 0              | <b>0</b>            |
| General disorders and administration site conditions | 1 (<0.5%)              | 2 (1%)          | 0 (0%)        | 0 (0%)        | <b>3 (1%)</b>       | 0 (0%)                 | 0 (0%)          | 0 (0%)        | 1 (<0.5%)     | <b>1 (&lt;0.5%)</b> | 0 (0%)                 | 0 (0%)          | 0 (0%)        | 5 (2%)         | <b>5 (2%)</b>       |
| Death                                                | 0                      | 0               | 0             | 0             | <b>0</b>            | 0                      | 0               | 0             | 0             | <b>0</b>            | 0                      | 0               | 0             | 2              | <b>2</b>            |
| Death neonatal                                       | 0                      | 0               | 0             | 0             | <b>0</b>            | 0                      | 0               | 0             | 1             | <b>1</b>            | 0                      | 0               | 0             | 3              | <b>3</b>            |
| Fever neonatal                                       | 0                      | 2               | 0             | 0             | <b>2</b>            | 0                      | 0               | 0             | 0             | <b>0</b>            | 0                      | 0               | 0             | 0              | <b>0</b>            |
| Pyrexia                                              | 1                      | 0               | 0             | 0             | <b>1</b>            | 0                      | 0               | 0             | 0             | <b>0</b>            | 0                      | 0               | 0             | 0              | <b>0</b>            |
| Hepatobiliary disorders                              | 0 (0%)                 | 0 (0%)          | 0 (0%)        | 0 (0%)        | <b>0 (0%)</b>       | 0 (0%)                 | 1 (<0.5%)       | 0 (0%)        | 0 (0%)        | <b>1 (&lt;0.5%)</b> | 0 (0%)                 | 0 (0%)          | 0 (0%)        | 0 (0%)         | <b>0 (0%)</b>       |
| Hyperbilirubinaemia neonatal                         | 0                      | 0               | 0             | 0             | <b>0</b>            | 0                      | 1               | 0             | 0             | <b>1</b>            | 0                      | 0               | 0             | 0              | <b>0</b>            |
| Infections and infestations                          | 1 (<0.5%)              | 3 (1%)          | 0 (0%)        | 0 (0%)        | <b>4 (2%)</b>       | 1 (<0.5%)              | 9 (4%)          | 0 (0%)        | 1 (<0.5%)     | <b>11 (5%)</b>      | 1 (<0.5%)              | 6 (3%)          | 0 (0%)        | 3 (1%)         | <b>10 (5%)</b>      |
| Bronchiolitis                                        | 0                      | 0               | 0             | 0             | <b>0</b>            | 0                      | 0               | 0             | 0             | <b>0</b>            | 0                      | 1               | 0             | 0              | <b>1</b>            |
| Neonatal pneumonia                                   | 0                      | 0               | 0             | 0             | <b>0</b>            | 0                      | 1               | 0             | 0             | <b>1</b>            | 0                      | 1               | 0             | 0              | <b>1</b>            |

|                                                | DTG+FTC/TAF<br>(N=208) |           |           |           |               | DTG+FTC/TDF<br>(N=202) |        |           |        |                     | EFV/FTC/TDF<br>(N=207) |           |        |        |                     |
|------------------------------------------------|------------------------|-----------|-----------|-----------|---------------|------------------------|--------|-----------|--------|---------------------|------------------------|-----------|--------|--------|---------------------|
|                                                | 2                      | 3         | 4         | 5         | Total         | 2                      | 3      | 4         | 5      | Total               | 2                      | 3         | 4      | 5      | Total               |
| Omphalitis                                     | 0                      | 0         | 0         | 0         | <b>0</b>      | 1                      | 0      | 0         | 0      | <b>1</b>            | 0                      | 0         | 0      | 0      | <b>0</b>            |
| Pneumonia                                      | 0                      | 0         | 0         | 0         | <b>0</b>      | 0                      | 0      | 0         | 1      | <b>1</b>            | 0                      | 0         | 0      | 0      | <b>0</b>            |
| Sepsis neonatal                                | 1                      | 3         | 0         | 0         | <b>4</b>      | 0                      | 7      | 0         | 0      | <b>7</b>            | 0                      | 3         | 0      | 3      | <b>6</b>            |
| Septic shock                                   | 0                      | 0         | 0         | 0         | <b>0</b>      | 0                      | 0      | 0         | 0      | <b>0</b>            | 0                      | 0         | 1      | 0      | <b>1</b>            |
| Staphylococcal scalded skin syndrome           | 1                      | 0         | 0         | 0         | <b>1</b>      | 0                      | 0      | 0         | 0      | <b>0</b>            | 1                      | 1         | 0      | 0      | <b>2</b>            |
| Umbilical sepsis                               | 0                      | 0         | 0         | 0         | <b>0</b>      | 0                      | 0      | 0         | 0      | <b>0</b>            | 1                      | 0         | 0      | 0      | <b>1</b>            |
| Urinary tract infection neonatal               | 0                      | 0         | 0         | 0         | <b>0</b>      | 0                      | 1      | 0         | 0      | <b>1</b>            | 0                      | 0         | 0      | 0      | <b>0</b>            |
| Injury, poisoning and procedural complications | 0 (0%)                 | 0 (0%)    | 0 (0%)    | 0 (0%)    | <b>0 (0%)</b> | 0 (0%)                 | 0 (0%) | 0 (0%)    | 0 (0%) | <b>0 (0%)</b>       | 0 (0%)                 | 1 (<0.5%) | 0 (0%) | 0 (0%) | <b>1 (&lt;0.5%)</b> |
| Femur fracture                                 | 0                      | 0         | 0         | 0         | <b>0</b>      | 0                      | 0      | 0         | 0      | <b>0</b>            | 0                      | 1         | 0      | 0      | <b>1</b>            |
| Investigations                                 | 1 (<0.5%)              | 7 (3%)    | 1 (<0.5%) | 0 (0%)    | <b>9 (4%)</b> | 1 (<0.5%)              | 9 (4%) | 2 (1%)    | 0 (0%) | <b>12 (6%)</b>      | 1 (<0.5%)              | 7 (3%)    | 6 (3%) | 0 (0%) | <b>14 (7%)</b>      |
| Alanine aminotransferase increased             | 0                      | 0         | 0         | 0         | <b>0</b>      | 0                      | 0      | 0         | 0      | <b>0</b>            | 0                      | 0         | 1      | 0      | <b>1</b>            |
| Blood bilirubin increased                      | 0                      | 0         | 1         | 0         | <b>1</b>      | 0                      | 0      | 0         | 0      | <b>0</b>            | 0                      | 0         | 0      | 0      | <b>0</b>            |
| Blood creatinine increased                     | 1                      | 2         | 0         | 0         | <b>3</b>      | 0                      | 5      | 0         | 0      | <b>5</b>            | 1                      | 2         | 2      | 0      | <b>5</b>            |
| Blood glucose decreased                        | 0                      | 3         | 0         | 0         | <b>3</b>      | 0                      | 1      | 2         | 0      | <b>3</b>            | 0                      | 1         | 3      | 0      | <b>4</b>            |
| Blood potassium increased                      | 0                      | 0         | 0         | 0         | <b>0</b>      | 0                      | 0      | 0         | 0      | <b>0</b>            | 0                      | 1         | 0      | 0      | <b>1</b>            |
| Cardiac murmur                                 | 0                      | 0         | 0         | 0         | <b>0</b>      | 1                      | 0      | 0         | 0      | <b>1</b>            | 0                      | 0         | 0      | 0      | <b>0</b>            |
| Haemoglobin decreased                          | 0                      | 1         | 0         | 0         | <b>1</b>      | 0                      | 0      | 0         | 0      | <b>0</b>            | 0                      | 0         | 0      | 0      | <b>0</b>            |
| Neutrophil count decreased                     | 0                      | 1         | 0         | 0         | <b>1</b>      | 0                      | 2      | 0         | 0      | <b>2</b>            | 0                      | 2         | 0      | 0      | <b>2</b>            |
| Platelet count decreased                       | 0                      | 0         | 0         | 0         | <b>0</b>      | 0                      | 1      | 0         | 0      | <b>1</b>            | 0                      | 0         | 0      | 0      | <b>0</b>            |
| White blood cell count decreased               | 0                      | 0         | 0         | 0         | <b>0</b>      | 0                      | 0      | 0         | 0      | <b>0</b>            | 0                      | 1         | 0      | 0      | <b>1</b>            |
| Metabolism and nutrition disorders             | 1 (<0.5%)              | 1 (<0.5%) | 0 (0%)    | 0 (0%)    | <b>2 (1%)</b> | 0 (0%)                 | 2 (1%) | 1 (<0.5%) | 0 (0%) | <b>3 (1%)</b>       | 0 (0%)                 | 0 (0%)    | 0 (0%) | 0 (0%) | <b>0 (0%)</b>       |
| Dehydration                                    | 0                      | 0         | 0         | 0         | <b>0</b>      | 0                      | 1      | 0         | 0      | <b>1</b>            | 0                      | 0         | 0      | 0      | <b>0</b>            |
| Hypoglycaemia                                  | 1                      | 1         | 0         | 0         | <b>2</b>      | 0                      | 0      | 1         | 0      | <b>1</b>            | 0                      | 0         | 0      | 0      | <b>0</b>            |
| Hypoglycaemia neonatal                         | 0                      | 0         | 0         | 0         | <b>0</b>      | 0                      | 1      | 0         | 0      | <b>1</b>            | 0                      | 0         | 0      | 0      | <b>0</b>            |
| Nervous system disorders                       | 1 (<0.5%)              | 2 (1%)    | 0 (0%)    | 1 (<0.5%) | <b>4 (2%)</b> | 1 (<0.5%)              | 0 (0%) | 0 (0%)    | 0 (0%) | <b>1 (&lt;0.5%)</b> | 0 (0%)                 | 4 (2%)    | 0 (0%) | 3 (1%) | <b>7 (3%)</b>       |
| Fontanelle bulging                             | 0                      | 0         | 0         | 0         | <b>0</b>      | 0                      | 0      | 0         | 0      | <b>0</b>            | 0                      | 1         | 0      | 0      | <b>1</b>            |
| Hydrocephalus                                  | 0                      | 0         | 0         | 0         | <b>0</b>      | 0                      | 0      | 0         | 0      | <b>0</b>            | 0                      | 1         | 0      | 0      | <b>1</b>            |
| Hypoxic-ischaemic encephalopathy               | 0                      | 1         | 0         | 1         | <b>2</b>      | 0                      | 0      | 0         | 0      | <b>0</b>            | 0                      | 2         | 0      | 3      | <b>5</b>            |
| Intraventricular haemorrhage                   | 0                      | 0         | 0         | 0         | <b>0</b>      | 0                      | 0      | 0         | 0      | <b>0</b>            | 0                      | 1         | 0      | 0      | <b>1</b>            |
| Neonatal seizure                               | 0                      | 1         | 0         | 0         | <b>1</b>      | 1                      | 0      | 0         | 0      | <b>1</b>            | 0                      | 0         | 0      | 0      | <b>0</b>            |

|                                                 | DTG+FTC/TAF<br>(N=208) |           |        |           |                     | DTG+FTC/TDF<br>(N=202) |        |        |           |               | EFV/FTC/TDF<br>(N=207) |         |        |           |                |
|-------------------------------------------------|------------------------|-----------|--------|-----------|---------------------|------------------------|--------|--------|-----------|---------------|------------------------|---------|--------|-----------|----------------|
|                                                 | 2                      | 3         | 4      | 5         | Total               | 2                      | 3      | 4      | 5         | Total         | 2                      | 3       | 4      | 5         | Total          |
| Poor sucking reflex                             | 1                      | 0         | 0      | 0         | <b>1</b>            | 0                      | 0      | 0      | 0         | <b>0</b>      | 0                      | 0       | 0      | 0         | <b>0</b>       |
| Pregnancy, puerperium and perinatal conditions  | 2 (1%)                 | 4 (2%)    | 0 (0%) | 0 (0%)    | <b>6 (3%)</b>       | 2 (1%)                 | 7 (3%) | 0 (0%) | 0 (0%)    | <b>9 (4%)</b> | 1 (<0.5%)              | 5 (2%)  | 0 (0%) | 1 (<0.5%) | <b>7 (3%)</b>  |
| Birth trauma                                    | 0                      | 0         | 0      | 0         | <b>0</b>            | 0                      | 0      | 0      | 0         | <b>0</b>      | 0                      | 1       | 0      | 0         | <b>1</b>       |
| Hypothermia neonatal                            | 0                      | 0         | 0      | 0         | <b>0</b>            | 0                      | 1      | 0      | 0         | <b>1</b>      | 0                      | 0       | 0      | 0         | <b>0</b>       |
| Jaundice neonatal                               | 2                      | 1         | 0      | 0         | <b>3</b>            | 0                      | 1      | 0      | 0         | <b>1</b>      | 0                      | 0       | 0      | 0         | <b>0</b>       |
| Low birth weight baby                           | 1                      | 1         | 0      | 0         | <b>2</b>            | 0                      | 1      | 0      | 0         | <b>1</b>      | 1                      | 0       | 0      | 0         | <b>1</b>       |
| Meconium in amniotic fluid                      | 0                      | 0         | 0      | 0         | <b>0</b>            | 0                      | 0      | 0      | 0         | <b>0</b>      | 0                      | 1       | 0      | 0         | <b>1</b>       |
| Premature baby                                  | 0                      | 1         | 0      | 0         | <b>1</b>            | 2                      | 4      | 0      | 0         | <b>6</b>      | 1                      | 3       | 0      | 1         | <b>5</b>       |
| Umbilical cord cyst                             | 0                      | 1         | 0      | 0         | <b>1</b>            | 0                      | 0      | 0      | 0         | <b>0</b>      | 0                      | 0       | 0      | 0         | <b>0</b>       |
| Renal and urinary disorders                     | 1 (<0.5%)              | 0 (0%)    | 0 (0%) | 0 (0%)    | <b>1 (&lt;0.5%)</b> | 0 (0%)                 | 0 (0%) | 0 (0%) | 0 (0%)    | <b>0 (0%)</b> | 0 (0%)                 | 0 (0%)  | 0 (0%) | 0 (0%)    | <b>0 (0%)</b>  |
| Acute kidney injury                             | 1                      | 0         | 0      | 0         | <b>1</b>            | 0                      | 0      | 0      | 0         | <b>0</b>      | 0                      | 0       | 0      | 0         | <b>0</b>       |
| Respiratory, thoracic and mediastinal disorders | 1 (<0.5%)              | 8 (4%)    | 2 (1%) | 1 (<0.5%) | <b>12 (6%)</b>      | 1 (<0.5%)              | 5 (2%) | 0 (0%) | 1 (<0.5%) | <b>7 (3%)</b> | 1 (<0.5%)              | 10 (5%) | 0 (0%) | 0 (0%)    | <b>11 (5%)</b> |
| Meconium aspiration syndrome                    | 1                      | 1         | 0      | 0         | <b>2</b>            | 0                      | 1      | 0      | 0         | <b>1</b>      | 0                      | 5       | 0      | 0         | <b>5</b>       |
| Neonatal asphyxia                               | 0                      | 1         | 1      | 1         | <b>3</b>            | 0                      | 0      | 0      | 1         | <b>1</b>      | 0                      | 2       | 0      | 0         | <b>2</b>       |
| Neonatal respiratory distress                   | 0                      | 0         | 0      | 0         | <b>0</b>            | 1                      | 1      | 0      | 0         | <b>2</b>      | 0                      | 0       | 0      | 0         | <b>0</b>       |
| Neonatal respiratory distress syndrome          | 0                      | 5         | 0      | 0         | <b>5</b>            | 0                      | 2      | 0      | 0         | <b>2</b>      | 0                      | 2       | 0      | 0         | <b>2</b>       |
| Neonatal tachypnoea                             | 0                      | 0         | 0      | 0         | <b>0</b>            | 0                      | 1      | 0      | 0         | <b>1</b>      | 0                      | 1       | 0      | 0         | <b>1</b>       |
| Respiratory distress                            | 0                      | 0         | 0      | 0         | <b>0</b>            | 0                      | 0      | 0      | 0         | <b>0</b>      | 1                      | 0       | 0      | 0         | <b>1</b>       |
| Transient tachypnoea of the newborn             | 0                      | 2         | 1      | 0         | <b>3</b>            | 0                      | 0      | 0      | 0         | <b>0</b>      | 0                      | 1       | 0      | 0         | <b>1</b>       |
| Use of accessory respiratory muscles            | 0                      | 0         | 0      | 0         | <b>0</b>            | 0                      | 0      | 0      | 0         | <b>0</b>      | 0                      | 1       | 0      | 0         | <b>1</b>       |
| Skin and subcutaneous tissue disorders          | 0 (0%)                 | 1 (<0.5%) | 0 (0%) | 0 (0%)    | <b>1 (&lt;0.5%)</b> | 0 (0%)                 | 0 (0%) | 0 (0%) | 0 (0%)    | <b>0 (0%)</b> | 0 (0%)                 | 0 (0%)  | 0 (0%) | 0 (0%)    | <b>0 (0%)</b>  |
| Rash neonatal                                   | 0                      | 1         | 0      | 0         | <b>1</b>            | 0                      | 0      | 0      | 0         | <b>0</b>      | 0                      | 0       | 0      | 0         | <b>0</b>       |

Infants who experienced multiple events are reported once at the highest grade in the 'Overall' row. Similarly, infants who experienced multiple grade 2 or higher events within each row are reported once at the highest grade of that event.



**Table S15: Infant Safety Outcome Measure through 28 Days after Birth by Treatment Group**

| Outcome                                       | Experienced Outcome | Treatment Group      |                      |                      |                               | Total<br>N (%) | P-value <sup>2</sup>          |                               |  |
|-----------------------------------------------|---------------------|----------------------|----------------------|----------------------|-------------------------------|----------------|-------------------------------|-------------------------------|--|
|                                               |                     | DTG+FTC/TAF<br>N (%) | DTG+FTC/TDF<br>N (%) | EFV/FTC/TDF<br>N (%) | DTG+FTC/TAF<br>vs DTG+FTC/TDF |                | DTG+FTC/TDF<br>vs EFV/FTC/TDF | DTG+FTC/TAF<br>vs EFV/FTC/TDF |  |
| <b>Safety Outcome Measure<sup>1</sup></b>     | Yes                 | 29 (13.9%)           | 33 (16.3%)           | 43 (20.8%)           | 105 (17.0%)                   | 0.51           | 0.25                          | 0.069                         |  |
|                                               | No                  | 179 (86.1%)          | 169 (83.7%)          | 164 (79.2%)          | 512 (83.0%)                   |                |                               |                               |  |
|                                               | <b>Total</b>        | <b>208 (100.0%)</b>  | <b>202 (100.0%)</b>  | <b>207 (100.0%)</b>  | <b>617 (100.0%)</b>           |                |                               |                               |  |
| <b>Early Study Discontinuation as Failure</b> | Yes                 | 30 (14.4%)           | 34 (16.8%)           | 44 (21.3%)           | 108 (17.5%)                   | 0.51           | 0.26                          | 0.072                         |  |
|                                               | No                  | 178 (85.6%)          | 168 (83.2%)          | 163 (78.7%)          | 509 (82.5%)                   |                |                               |                               |  |
|                                               | <b>Total</b>        | <b>208 (100.0%)</b>  | <b>202 (100.0%)</b>  | <b>207 (100.0%)</b>  | <b>617 (100.0%)</b>           |                |                               |                               |  |

<sup>1</sup>The safety outcome measure was defined as experiencing at least one grade 3 or higher adverse event through 28 days after birth.

<sup>2</sup>Pairwise log-rank p-value between the two indicated treatment groups.

**Table S16: Infants Preterm and Small for Gestational Age**

| <b>Outcome</b>                        | <b>Treatment Group</b> |                    |                    | <b>Total</b>   |
|---------------------------------------|------------------------|--------------------|--------------------|----------------|
|                                       | <b>DTG+FTC/TAF</b>     | <b>DTG+FTC/TDF</b> | <b>EFV/FTC/TDF</b> |                |
|                                       | <b>n/N (%)</b>         | <b>n/N (%)</b>     | <b>n/N (%)</b>     | <b>n/N (%)</b> |
| Preterm and Small for Gestational Age | 1/202 (0.5%)           | 5/200 (2.5%)       | 1/200 (0.5%)       | 7/602 (1.2%)   |

**Table S17: Neonatal Deaths among Live Birth Infants**

|                                   |                  | Treatment Group     |                     |                      |                      | P-Values <sup>2</sup>      |                            |                            |
|-----------------------------------|------------------|---------------------|---------------------|----------------------|----------------------|----------------------------|----------------------------|----------------------------|
|                                   |                  | DTG+FTC/TAF         | DTG+FTC/TDF         | EFV/FTC/TDF          | Total                | DTG+FTC/TAF vs DTG+FTC/TDF | DTG+FTC/TDF vs EFV/FTC/TDF | DTG+FTC/TAF vs EFV/FTC/TDF |
|                                   |                  | N (%)               | N (%)               | N (%)                | N (%)                |                            |                            |                            |
| <b>Neonatal Death<sup>1</sup></b> | <b>Total</b>     | <b>2/208 (1.0%)</b> | <b>3/202 (1.5%)</b> | <b>10/207 (4.8%)</b> | <b>15/617 (2.4%)</b> | <b>0.65</b>                | <b>0.050</b>               | <b>0.019</b>               |
| Preterm Births                    | < 37 weeks       | 1/208 (0.5%)        | 0/202 (0.0%)        | 3/207 (1.4%)         | 4/617 (0.6%)         |                            |                            |                            |
|                                   | ≥ 37 weeks       | 1/208 (0.5%)        | 3/202 (1.5%)        | 7/207 (3.4%)         | 11/617 (1.8%)        |                            |                            |                            |
| Small for Gestational Age         | <10th Percentile | 2/202 (1.0%)        | 2/200 (1.0%)        | 3/200 (1.5%)         | 7/602 (1.2%)         |                            |                            |                            |
|                                   | ≥10th Percentile | 0/202 (0.0%)        | 1/200 (0.5%)        | 4/200 (2.0%)         | 5/602 (0.8%)         |                            |                            |                            |

<sup>1</sup>Neonatal deaths were defined as a live born infant death that occurred within 0 to 28 days after birth.

<sup>2</sup>Pairwise log-rank p-value between the two indicated treatment arms.

**Table S18: Infant Neonatal Death Narratives**

| Treatment Group    | Treatment Group Count | Cause of Death                                                       | Age at Death (Weeks) | Gestational Age at Delivery (Weeks) | Weight at Delivery (g) | Small for Gestational Age? | HIV-1 Infection Status | Number of HIV NAT tests | Grade 5 Adverse Event Reported          | Death Narrative                                                                                                                                                                                            |
|--------------------|-----------------------|----------------------------------------------------------------------|----------------------|-------------------------------------|------------------------|----------------------------|------------------------|-------------------------|-----------------------------------------|------------------------------------------------------------------------------------------------------------------------------------------------------------------------------------------------------------|
| <b>DTG+FTC/TAF</b> | 1                     | hypoxic ischaemic encephalopathy                                     | 0-3                  | 39-0                                | 2,730-0                | Yes                        | Unknown                | 0                       | Hypoxic-ischaemic encephalopathy        | child had hypoxic ischaemic encephalopathy following prolonged labour and failed vacuum extraction due to cephalopelvic disproportion.                                                                     |
|                    | 2                     | BIRTH ASPHYXIA                                                       | 0-1                  | 34-4                                | 1,710-0                | Yes                        | Unknown                | 0                       | Neonatal asphyxia                       | PARTICIPANT HAD RESPIRATORY DISTRESS WITH CYANOSIS AND HAD A DISTENDED ABDOMEN. CHILD DIED LESS THAN 3 HOURS AFTER BIRTH                                                                                   |
| <b>DTG+FTC/TDF</b> | 1                     | Unknown cause of death, neonatal.                                    | 1-1                  | 41-0                                | 2,990-0                | Yes                        | Infected               | 1                       | Death neonatal                          | Baby died suddenly from unknown causes at home. There is no history of prior illnesses.                                                                                                                    |
|                    | 2                     | probable pneumonia                                                   | 2-3                  | 41-3                                | 2,750-0                | Yes                        | Indeterminate          | 1                       | Pneumonia                               | per mothers report infant developed a hot body and runny nose on [REDACTED].the infant deteriorated on [REDACTED] ,was grunting, had difficulties breastfeeding and died in the early hours of [REDACTED]. |
|                    | 3                     | Birth asphyxia                                                       | 0-3                  | 38-9                                | 3,300-0                | No                         | Unknown                | 0                       | Neonatal asphyxia                       | Cord around the neck at birth which resulted into birth asphyxia                                                                                                                                           |
| <b>EFV/FTC/TDF</b> | 1                     | Neonatal septicemia                                                  | 1-0                  | 43-1                                | 2,730-0                | Yes                        | Unknown                | 0                       | Duodenal atresia, Sepsis neonatal       | A one week old neonate died on [REDACTED] from probable septicaemia following surgery for neonatal bowel obstruction due to duodenal atresia.                                                              |
|                    | 2                     | Cardiopulmonary failure secondary to hypoxic ischemic encephalopathy | 0-3                  | 40-6                                | 3,420-0                | No                         | Unknown                | 0                       | Hypoxic-ischaemic encephalopathy, Death | Male baby born via SVD with very low Apgar Score, diagnosed with Hypoxic Ischemic Encephalopathy. Managed on fluids, CPAP, antibiotics, but died on [REDACTED].                                            |

| Treatment Group | Treatment Group Count | Cause of Death                           | Age at Death (Weeks) | Gestational Age at Delivery (Weeks) | Weight at Delivery (g) | Small for Gestational Age? | HIV-1 Infection Status | Number of HIV NAT tests | Grade 5 Adverse Event Reported   | Death Narrative                                                                                                                                                                                                                                       |
|-----------------|-----------------------|------------------------------------------|----------------------|-------------------------------------|------------------------|----------------------------|------------------------|-------------------------|----------------------------------|-------------------------------------------------------------------------------------------------------------------------------------------------------------------------------------------------------------------------------------------------------|
|                 | 3                     | Foetal distress due to prolonged labour. | 0-1                  | 39-0                                |                        |                            | Unknown                | 0                       | Death neonatal                   | Mom had prolonged labour with meconium stained liquor. Baby passed away +\2 hours after delivery.                                                                                                                                                     |
|                 | 4                     | Suspected neonatal sepsis                | 1-7                  | 37-7                                | 2,080-0                | Yes                        | Indeterminate          | 1                       | Sepsis neonatal                  | baby died at home on [REDACTED] at age 12days.                                                                                                                                                                                                        |
|                 | 5                     | grade 3 Hypoxic Ischemic Encephalopathy  | 0-1                  | 35-1                                | 2,450-0                | No                         | Unknown                | 0                       | Hypoxic-ischaemic encephalopathy | child hospitalised with grade 3 HIE post delivery, had grade 2 respiratory distress. Child was given IV antibiotics, feeds and NVP given by NGT.Deteriorated and died [REDACTED]                                                                      |
|                 | 6                     | Severe prematurity                       | 0-1                  | 25-1                                |                        |                            | Unknown                | 0                       | Death neonatal                   | Infant was born prematurely at 24 weeks of gestation and died 9 hours and 20 minutes after birth                                                                                                                                                      |
|                 | 7                     | Hypoxic ischaemic encephalopathy         | 0-6                  | 39-7                                | 2,900-0                | No                         | Unknown                | 0                       | Hypoxic-ischaemic encephalopathy | The child was hospitalized on the day of delivery with diagnosis of hypoxic ischaemic encephalopathy with initial Thompson score of 10 (grade 3) and meconium aspiration syndrome.The child's conditiondeteriorated and the child died on [REDACTED]. |
|                 | 8                     | <i>Not Available</i>                     | 0-0                  | 43-6                                |                        |                            | Unknown                | 0                       | Death neonatal                   | SHE DELIVERED BY THE ROADSIDE AND THE DELIVERY WAS COMPLETED FROM A CLINIC.SHE REPORTS THAT BABY DID NOT CRY AT BIRTH AND WAS DECLARED DEAD 3 HOURS LATER AT THE CLINIC.                                                                              |
|                 | 9                     | NEONATAL SEPSIS                          | 2-6                  | 38-7                                | 2,520-0                | Yes                        | Indeterminate          | 1                       | Sepsis neonatal                  | BABY DIED DUE TO NEONATAL SEPSIS                                                                                                                                                                                                                      |
|                 | 10                    | NEONATAL RESPIRATORY DISTRESS SYNDROME   | 0-0                  | 31-2                                | 1,700-0                | No                         | Unknown                | 0                       | Death                            | DELIVERED FOLLOWING PRETERM LABOUR.CHILD STARTED EXPERIENCING DIFFICULTIES IN BREATHING WHICH WORSENEED AND THE CHILD DIED                                                                                                                            |

Dates were redacted from the above death narratives.

**Table S19: Post-hoc Analysis for Pairwise Differences in Stillbirth or Neonatal Deaths**

| Outcome                      | Comparison                | Proportion within Treatment Group |               |               | Pairwise Comparisons |
|------------------------------|---------------------------|-----------------------------------|---------------|---------------|----------------------|
|                              |                           | DTG+FTC/TAF                       | DTG+FTC/TDF   | EFV/FTC/TDF   | Difference (95% CI)  |
| Stillbirth or Neonatal Death | DTG+FTC/TAF - DTG+FTC/TDF | 10/216 (4.6%)                     | 14/213 (6.6%) |               | -1.9% (-6.3%, 2.4%)  |
|                              | DTG+FTC/TDF - EFV/FTC/TDF |                                   | 14/213 (6.6%) | 14/211 (6.6%) | -0.1% (-4.8%, 4.7%)  |
|                              | DTG+FTC/TAF - EFV/FTC/TDF | 10/216 (4.6%)                     |               | 14/211 (6.6%) | -2.0% (-6.4%, 2.4%)  |

**Table S20: Endpoint Review Determination of Major Congenital Anomalies by Group**

| <b>Major Congenital Anomaly Identified</b> | <b>Treatment Group</b> |                     |                     | <b>Total</b>        |
|--------------------------------------------|------------------------|---------------------|---------------------|---------------------|
|                                            | <b>DTG+FTC/TAF</b>     | <b>DTG+FTC/TDF</b>  | <b>EFV/FTC/TDF</b>  |                     |
|                                            | <b>N (%)</b>           | <b>N (%)</b>        | <b>N (%)</b>        | <b>N (%)</b>        |
| Yes                                        | 1 (0.5%)               | 0 (0.0%)            | 2 (1.0%)            | 3 (0.5%)            |
| No                                         | 207 (99.5%)            | 202 (100.0%)        | 205 (99.0%)         | 614 (99.5%)         |
| <b>Total</b>                               | <b>208 (100.0%)</b>    | <b>202 (100.0%)</b> | <b>207 (100.0%)</b> | <b>617 (100.0%)</b> |

**Table S21: Listing of Site Reported Suspected Congenital Anomalies and Endpoint Review Determination**

| Classification   | Treatment Group    | Treatment Group Count | Endpoint Review                                   |                                  |                                                                                                                                        | Site Reported |                                  |                          |   |
|------------------|--------------------|-----------------------|---------------------------------------------------|----------------------------------|----------------------------------------------------------------------------------------------------------------------------------------|---------------|----------------------------------|--------------------------|---|
|                  |                    |                       | Diagnosis                                         | Anomaly Category                 | Comments                                                                                                                               | Age (Weeks)   | Site-Reported Adverse Event (AE) | Site-Reported AE Grade   |   |
| <b>Major</b>     | <b>DTG+FTC/TAF</b> | 1                     | Talipes Equinovarus, Right Foot                   | Talipes Equinovarus              | Major Malformation; Structural Abnormality W/ Medical Importance; Requires Medical/Surgical Intervention                               | 0-0           | Talipes                          | 2                        |   |
|                  | <b>EFV/FTC/TDF</b> | 1                     | Duodenal Atresia And Ileal Stenosis               | Duodenal Atresia; Ileal Stenosis |                                                                                                                                        | 0-0           | Duodenal atresia                 | 5                        |   |
|                  |                    | 2                     | Subgaleal Cyst                                    | Subgaleal (Cranial) Cyst         | Small Swelling, Frontal Aspect Of Head, Situated In Anterioraspect Of Anterior Fontanelle; Us Showed Findings Of Subgaleal Cystic Mass | -             | <i>No Adverse Event Reported</i> | -                        |   |
| <b>Not Major</b> | <b>DTG+FTC/TAF</b> | 1                     | Port Wine Stain                                   | Birth Mark                       | No Surgicalical/Medicalical Importance (On Inner Aspect Of Upper Arm/Axilla/Part Of Chest)                                             | 0-0           | Naevus flammeus                  | 2                        |   |
|                  |                    | 2                     | Pre-Auricular Skin Tag                            | Other Minoranomaly               | Small Pre-Auricular Skin Tag; No Medical Importance; Surgicalery Not Required; No Other Concomitant Abnormalities Reported             | 0-0           | Accessory auricle                | 1                        |   |
|                  |                    | 3                     | Umbilical Cyst                                    | Not An Anomaly                   | No Abdomical Wall Defect; Cyst On Umbilical Cord Outside Abd Wall; Op Rpt: Umbilical Hernia                                            | 0-0           | Umbilical cord cyst              | 3                        |   |
|                  |                    | 4                     | Atrial Septal Defect                              | Not An Anomaly                   | Asymptomatic; Small; Likely To Resolve Spontaneously                                                                                   | 11-0          | Atrial septal defect             | 1                        |   |
|                  |                    | 5                     | Sacral Dimple                                     | Other Minor Anomaly              | Defined As Common Minor Anomaly. Does Not Require Medical/Surgical Intervention                                                        | 0-0           | Congenital skin dimples          | 1                        |   |
|                  |                    | 6                     | Atrial Septal Defect And Patent Ductus Arteriosus | Not An Anomaly                   | Not Malformation; Small Asd And Pda At 2 Days Age Common And Resolve Spontaneously                                                     | 0-0           | Atrial septal defect             | 1                        |   |
|                  |                    |                       |                                                   |                                  |                                                                                                                                        |               |                                  | Cardiac murmur           | 1 |
|                  |                    |                       |                                                   |                                  |                                                                                                                                        |               |                                  | Patent ductus arteriosus | 1 |
|                  |                    | 7                     | Haemangioma Right Index Finger                    | Birth Mark                       | No Surgicalical/Medicalical Importance                                                                                                 | 0-0           | Haemangioma congenital           | 1                        |   |
|                  |                    | 8                     | Sacral Dimple                                     | Other Minor Anomaly              | Defined As Common Minor Anomaly. Does Not Require Medical/Surgical Intervention                                                        | 0-0           | Congenital skin dimples          | 1                        |   |



| Classification                          | Treatment Group | Treatment Group Count           | Endpoint Review                   |                                                                                  |                                                                            | Site Reported                                            |                                                                                                               |                                   |                                   |                                                                                                                  |                                                                                                   |                             |                                      |   |
|-----------------------------------------|-----------------|---------------------------------|-----------------------------------|----------------------------------------------------------------------------------|----------------------------------------------------------------------------|----------------------------------------------------------|---------------------------------------------------------------------------------------------------------------|-----------------------------------|-----------------------------------|------------------------------------------------------------------------------------------------------------------|---------------------------------------------------------------------------------------------------|-----------------------------|--------------------------------------|---|
|                                         |                 |                                 | Diagnosis                         | Anomaly Category                                                                 | Comments                                                                   | Age (Weeks)                                              | Site-Reported Adverse Event (AE)                                                                              | Site-Reported AE Grade            |                                   |                                                                                                                  |                                                                                                   |                             |                                      |   |
| DTG+FTC/TDF                             | 1               | Polydactyly (Postaxial, Type B) | Polydactyly (Postaxial, Type B)   | Pre-Defined As Not Major Common In African Infants; Isolated In 95% Of Instances | -                                                                          | No Adverse Event Reported                                | -                                                                                                             |                                   |                                   |                                                                                                                  |                                                                                                   |                             |                                      |   |
|                                         |                 | 2                               | Benign/Physiologic Cardiac Murmur | Not An Anomaly                                                                   | Detected On Day Of Birth; Subsequently No Longer Detected By Clinical Ausc | -                                                        | No Adverse Event Reported                                                                                     | -                                 |                                   |                                                                                                                  |                                                                                                   |                             |                                      |   |
|                                         |                 |                                 | 3                                 | Macrocephaly                                                                     | Not An Anomaly                                                             | No Other Defects, Large Head Alone Is Not A Malformation | 0-0                                                                                                           | Macrocephaly                      | 1                                 |                                                                                                                  |                                                                                                   |                             |                                      |   |
|                                         |                 |                                 |                                   | 4                                                                                | Long Fingers                                                               | Not An Anomaly                                           | Long Fingers Are Not An Anomaly; May Be Family Trait Or Marker Of Other Abnormality (Such As Marfan Syndrome) | 8-9                               | Congenital foot malformation      | 1                                                                                                                |                                                                                                   |                             |                                      |   |
|                                         |                 |                                 |                                   |                                                                                  |                                                                            |                                                          |                                                                                                               | 10-4                              | Talipes                           | 1                                                                                                                |                                                                                                   |                             |                                      |   |
|                                         |                 |                                 |                                   |                                                                                  |                                                                            |                                                          |                                                                                                               | 14-3                              | Arachnodactyly                    | 1                                                                                                                |                                                                                                   |                             |                                      |   |
|                                         |                 |                                 |                                   |                                                                                  |                                                                            |                                                          |                                                                                                               |                                   | Muscle contractions involuntary   | 1                                                                                                                |                                                                                                   |                             |                                      |   |
|                                         |                 |                                 |                                   |                                                                                  | 14-9                                                                       | Multiple congenital abnormalities                        | 3                                                                                                             |                                   |                                   |                                                                                                                  |                                                                                                   |                             |                                      |   |
|                                         |                 |                                 |                                   |                                                                                  | 5                                                                          | Hymenal Tag                                              | Hymenal Tag                                                                                                   | Not A Structural Abnormality      | -                                 | No Adverse Event Reported                                                                                        | -                                                                                                 |                             |                                      |   |
|                                         |                 |                                 |                                   |                                                                                  |                                                                            | 6                                                        | Flexion Contractures                                                                                          | Positional Deformity              | Not A Structural Abnormality      | 0-0                                                                                                              | Congenital joint malformation                                                                     | 2                           |                                      |   |
|                                         |                 |                                 |                                   |                                                                                  |                                                                            |                                                          | 7                                                                                                             | Dilatation Of Ureter/Renal Pelvis | Renal Abnormality                 | The Renal Pelvis Diameter Was Not Enlarged Because The Diameter Was 6mm. There Was No Evidence Of Hydronephrosis | 0-0                                                                                               | Congenital hydronephrosis   | 3                                    |   |
|                                         |                 |                                 |                                   |                                                                                  |                                                                            |                                                          |                                                                                                               |                                   |                                   |                                                                                                                  |                                                                                                   | Congenital ureteric anomaly | 3                                    |   |
|                                         |                 |                                 |                                   |                                                                                  |                                                                            |                                                          |                                                                                                               | 8                                 | Benign/Physiologic Cardiac Murmur | Not An Anomaly                                                                                                   | Murmur Detected At Week 6 Visit; No Clinical Manifestations; Caregivers Believe To Be Physiologic | 0-0                         | Cardiac murmur                       | 2 |
|                                         |                 |                                 |                                   |                                                                                  |                                                                            |                                                          |                                                                                                               |                                   |                                   |                                                                                                                  |                                                                                                   |                             | Congenital mitral valve incompetence | 1 |
| Congenital tricuspid valve incompetence | 1               |                                 |                                   |                                                                                  |                                                                            |                                                          |                                                                                                               |                                   |                                   |                                                                                                                  |                                                                                                   |                             |                                      |   |
|                                         |                 |                                 |                                   |                                                                                  |                                                                            |                                                          |                                                                                                               |                                   |                                   |                                                                                                                  |                                                                                                   |                             |                                      |   |
| EFV/FTC/TDF                             | 1               | Ankyloglossia Of Tongue         | Other Minor Anomaly               |                                                                                  |                                                                            |                                                          |                                                                                                               |                                   | Not A Structural Abnormality      | 0-0                                                                                                              | Ankyloglossia congenital                                                                          | 2                           |                                      |   |
|                                         |                 | Congenital Hydrocele            | Hydrocele                         | No Surgical/Medical Importance                                                   |                                                                            |                                                          |                                                                                                               |                                   | 5-4                               | Congenital inguinal hernia                                                                                       | 1                                                                                                 |                             |                                      |   |
|                                         |                 |                                 |                                   |                                                                                  |                                                                            |                                                          |                                                                                                               |                                   | 7-6                               | Hydrocele                                                                                                        | 1                                                                                                 |                             |                                      |   |

| Classification | Treatment Group | Treatment Group Count | Endpoint Review                 |                                 |                                                                                  | Site Reported |                                  |                        |
|----------------|-----------------|-----------------------|---------------------------------|---------------------------------|----------------------------------------------------------------------------------|---------------|----------------------------------|------------------------|
|                |                 |                       | Diagnosis                       | Anomaly Category                | Comments                                                                         | Age (Weeks)   | Site-Reported Adverse Event (AE) | Site-Reported AE Grade |
|                |                 | 3                     | Polydactyly (Postaxial, Type B) | Polydactyly (Postaxial, Type B) | Pre-Defined As Not Major Common In African Infants; Isolated In 95% Of Instances | -             | <i>No Adverse Event Reported</i> | -                      |
|                |                 | 4                     | Positional Deformity Of Feet    | Positional Deformity            | Determined To Be Positional Not Structural; Resolved Completely In [REDACTED]    | 0-0           | Limb malformation                | 1                      |

**Table S22: Infant Infection Details**

| Treatment Group | Participant | Age (Days) at First Positive Test | Maternal Viral Load Study Week | Maternal Gestational Age (Weeks) | Maternal Viral Load through First Positive HIV NAT Test (copies/mL) | Current Maternal ARV | Percent Taken <sup>1</sup> | Self-Reported Maternal Adherence in Past 30 Days       |                         |                        |
|-----------------|-------------|-----------------------------------|--------------------------------|----------------------------------|---------------------------------------------------------------------|----------------------|----------------------------|--------------------------------------------------------|-------------------------|------------------------|
|                 |             |                                   |                                |                                  |                                                                     |                      |                            | How Many Days was at least 1 Dose Missed? <sup>2</sup> | How Often? <sup>3</sup> | How Well? <sup>4</sup> |
| DTG+FTC/TAF     | Infant 1    | 4                                 | Entry                          | 26                               | 39,713                                                              | DTG/FTC/TAF          |                            |                                                        |                         |                        |
|                 |             |                                   | Antepartum Week 4              | 29                               | 9,866                                                               | DTG/FTC/TAF          | 100%                       | 0                                                      | Always                  | Very Good              |
|                 |             |                                   | Antepartum Week 8              | 34                               | 32,938                                                              | DTG/FTC/TAF          | 100%                       | 0                                                      | Always                  | Excellent              |
|                 |             |                                   | Antepartum Week 12             | 38                               | 103,794                                                             | DTG/FTC/TAF          | 100%                       | 0                                                      | Always                  | Excellent              |
|                 |             |                                   | <b>Delivery (13 Weeks)</b>     | <b>39</b>                        | <b>58,590*</b>                                                      | <b>DTG/FTC/TAF</b>   | <b>100%</b>                | <b>0</b>                                               | <b>Always</b>           | <b>Very Good</b>       |
| DTG+FTC/TDF     | Infant 2    | 2                                 | Entry                          | 25                               | <40 (Detected)                                                      | DTG/FTC/TDF          |                            |                                                        |                         |                        |
|                 |             |                                   | Antepartum Week 4              | 29                               | 42                                                                  | DTG/FTC/TDF          | 90%                        | 1                                                      | Almost Always           | Very Good              |
|                 |             |                                   | Antepartum Week 8              | 33                               | <40 (Not Detected)                                                  | DTG/FTC/TDF          | 100%                       | 0                                                      | Always                  | Excellent              |
|                 |             |                                   | Antepartum Week 12             | 37                               | <40 (Not Detected)                                                  | DTG/FTC/TDF          | 100%                       | 0                                                      | Always                  | Excellent              |
|                 |             |                                   | <b>Delivery (15 Weeks)</b>     | <b>41</b>                        | <b>&lt;40* (Not Detected)</b>                                       | <b>DTG/FTC/TDF</b>   | <b>100%</b>                | <b>0</b>                                               | <b>Almost Always</b>    | <b>Very Good</b>       |

The above table summarizes all infants who were identified as HIV-1 infected within 14 Days after Birth.

\*Maternal viral load sampled closest to the first positive HIV NAT test.

<sup>1</sup>How much of your ARVs you have taken in the last 30 days?

<sup>2</sup>In the last 30 days, on how many days did you miss at least one dose of any of your ARVs?

<sup>3</sup>In the last 30 days, how often did you take your ARVs in the way you were supposed to?

<sup>4</sup>In the last 30 days, how good a job did you do at taking your ARVs in the way you were supposed to?

**Figure S1: Time until HIV-1 RNA Viral Load <400 Copies/mL**

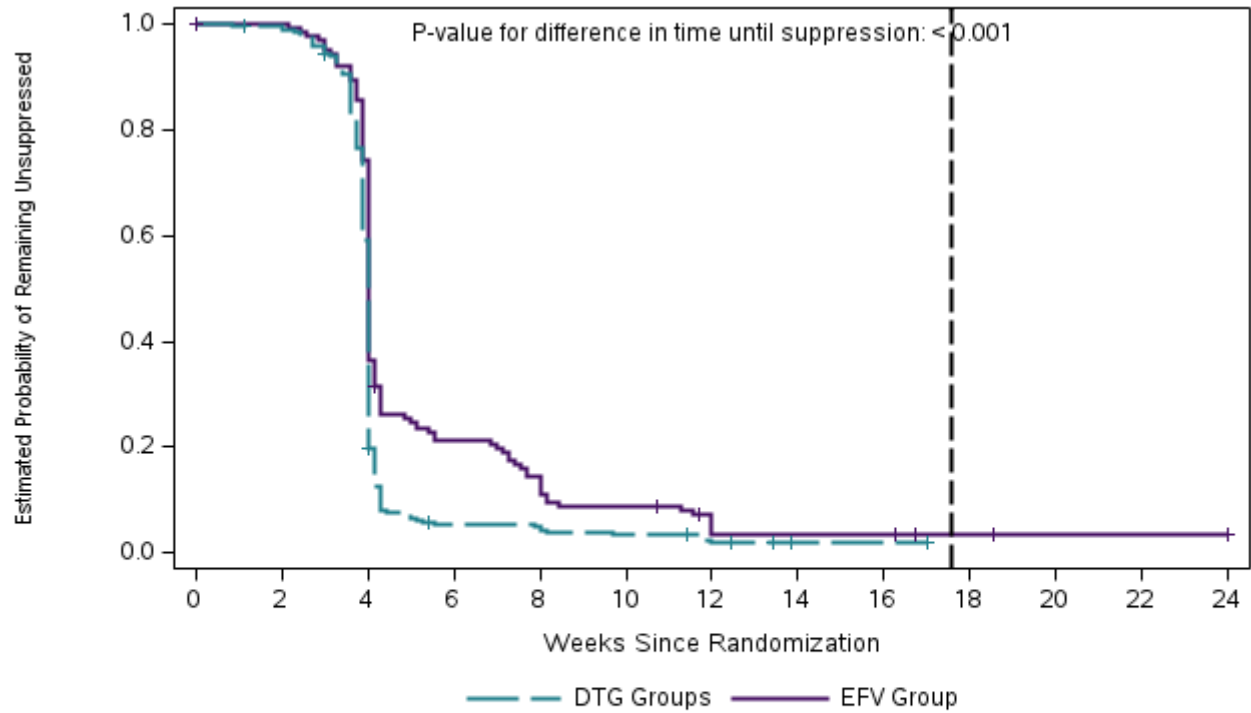

|            | Number at Risk                                                         |     |     |     |     |     |     |     |     |     |     |     |     |
|------------|------------------------------------------------------------------------|-----|-----|-----|-----|-----|-----|-----|-----|-----|-----|-----|-----|
|            | 0                                                                      | 2   | 4   | 6   | 8   | 10  | 12  | 14  | 16  | 18  | 20  | 22  | 24  |
| DTG Groups | 266                                                                    | 264 | 156 | 13  | 12  | 8   | 5   | 1   | 1   | 0   | 0   | 0   | 0   |
| EFV Group  | 141                                                                    | 140 | 104 | 29  | 20  | 12  | 8   | 4   | 4   | 2   | 1   | 1   | 1   |
|            | Cumulative Number of Women with at least One Viral Load <400 Copies/mL |     |     |     |     |     |     |     |     |     |     |     |     |
|            | 0                                                                      | 2   | 4   | 6   | 8   | 10  | 12  | 14  | 16  | 18  | 20  | 22  | 24  |
| DTG Groups | 0                                                                      | 3   | 212 | 249 | 252 | 254 | 257 | 257 | 257 | 257 | 257 | 257 | 257 |
| EFV Group  | 0                                                                      | 0   | 89  | 110 | 124 | 127 | 133 | 133 | 133 | 133 | 133 | 133 | 133 |

**Figure S2: Time until HIV-1 RNA Viral Load <1,000 Copies/mL**

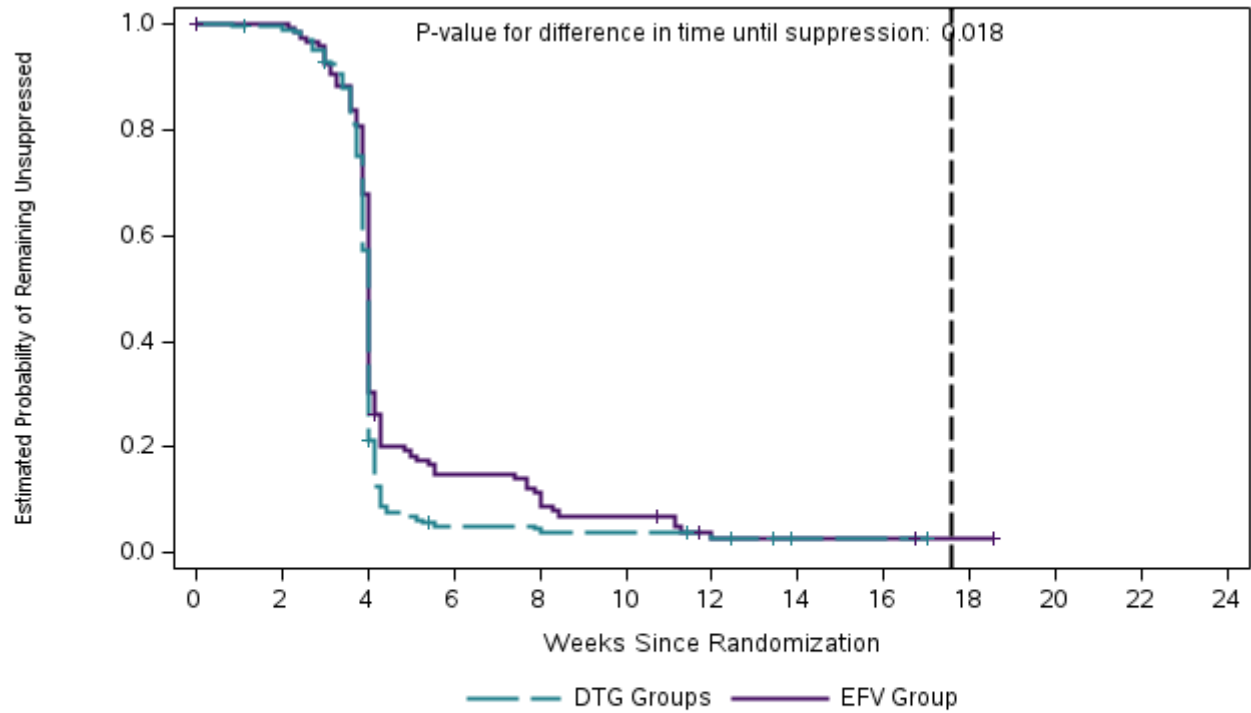

|            | Number at Risk                                                          |     |     |     |     |     |     |     |     |     |     |     |     |
|------------|-------------------------------------------------------------------------|-----|-----|-----|-----|-----|-----|-----|-----|-----|-----|-----|-----|
|            | 0                                                                       | 2   | 4   | 6   | 8   | 10  | 12  | 14  | 16  | 18  | 20  | 22  | 24  |
| DTG Groups | 198                                                                     | 196 | 112 | 9   | 8   | 7   | 5   | 1   | 1   | 0   | 0   | 0   | 0   |
| EFV Group  | 119                                                                     | 118 | 80  | 17  | 13  | 8   | 3   | 2   | 2   | 1   | 0   | 0   | 0   |
|            | Cumulative Number of Women with at least One Viral Load <1000 Copies/mL |     |     |     |     |     |     |     |     |     |     |     |     |
| DTG Groups | 0                                                                       | 2   | 154 | 185 | 187 | 187 | 189 | 189 | 189 | 189 | 189 | 189 | 189 |
| EFV Group  | 0                                                                       | 0   | 82  | 100 | 107 | 109 | 113 | 113 | 113 | 113 | 113 | 113 | 113 |

**Figure S3: Additional Pairwise Comparisons for the in the Primary Adverse Pregnancy Outcome Measures**

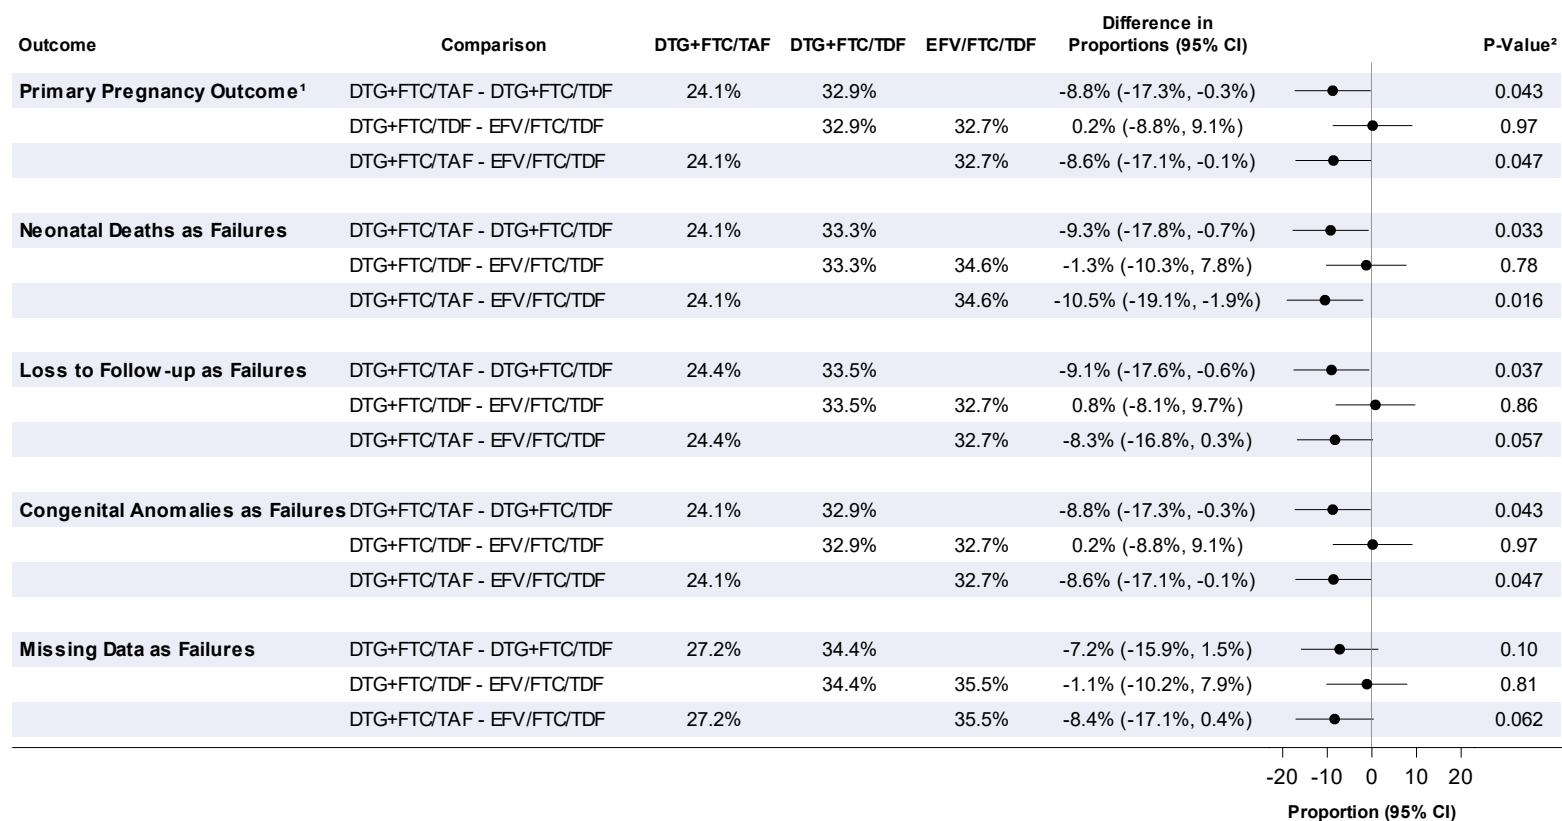

<sup>1</sup>Primary pregnancy outcome was the occurrence of stillbirth, spontaneous abortion, preterm delivery, or infant small for gestational age. This figure investigates the effect of an additional event in addition to the composite pregnancy outcome. The addition of neonatal deaths was a post-hoc analysis. The addition of loss to follow-up as an event was a pre-specified supplementary analysis. The addition of congenital anomalies was a pre-specified secondary analysis. The addition of missing data as a failure/event was a post-hoc analysis.

Figure S4: Mean (95% CI) Maternal Weight Change from Baseline by Study Week

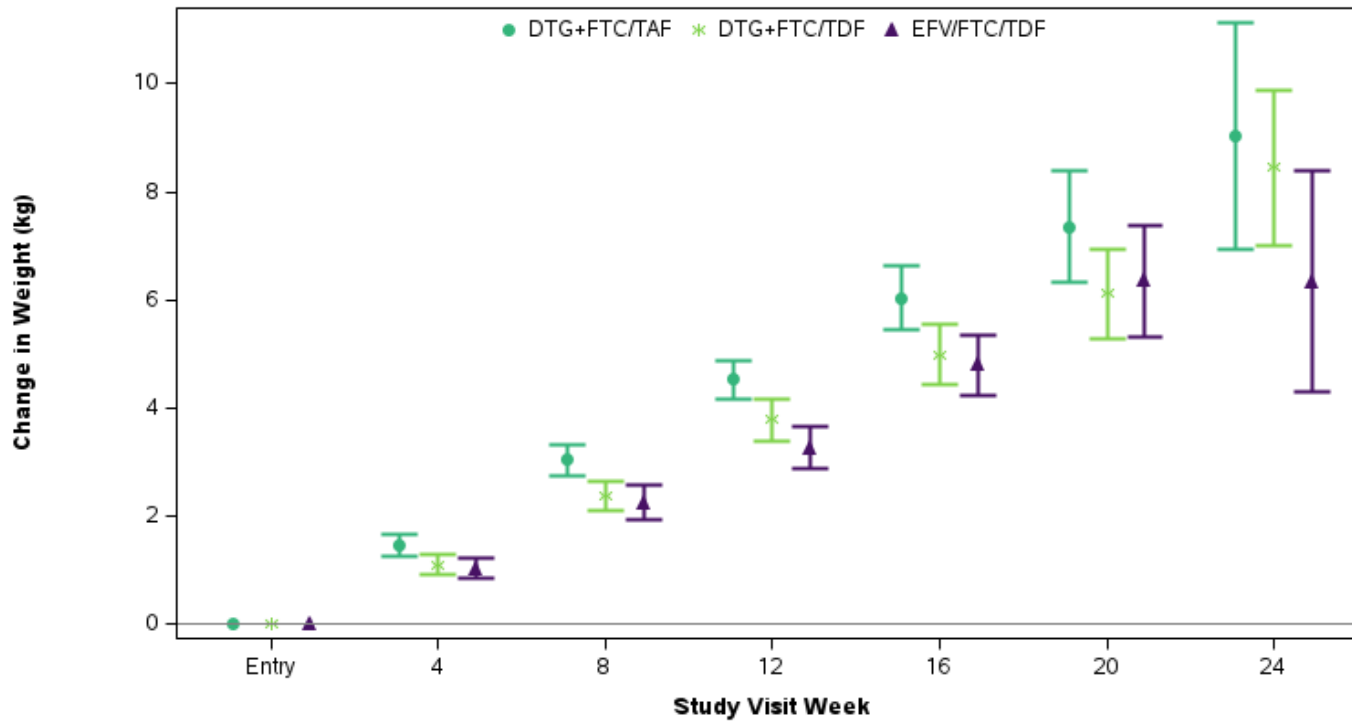

|             | Entry | 4   | 8   | 12  | 16  | 20 | 24 |
|-------------|-------|-----|-----|-----|-----|----|----|
| DTG+FTC/TAF | 216   | 213 | 208 | 198 | 130 | 58 | 25 |
| DTG+FTC/TDF | 214   | 211 | 204 | 188 | 136 | 74 | 22 |
| EFV/FTC/TDF | 210   | 206 | 201 | 184 | 126 | 55 | 20 |

95% confidence intervals around the mean weight change were constructed using a t-distribution.

Mean weight at entry was 67.7 kg in the DTG+FTC/TAF group, 66.3 kg in the DTG+FTC/TDF group, and 64.5 kg in the EFV/FTC/TDF group.

**Figure S5: Mean Change in Weight from Baseline by Treatment, Study Visit, and Gestational Age**

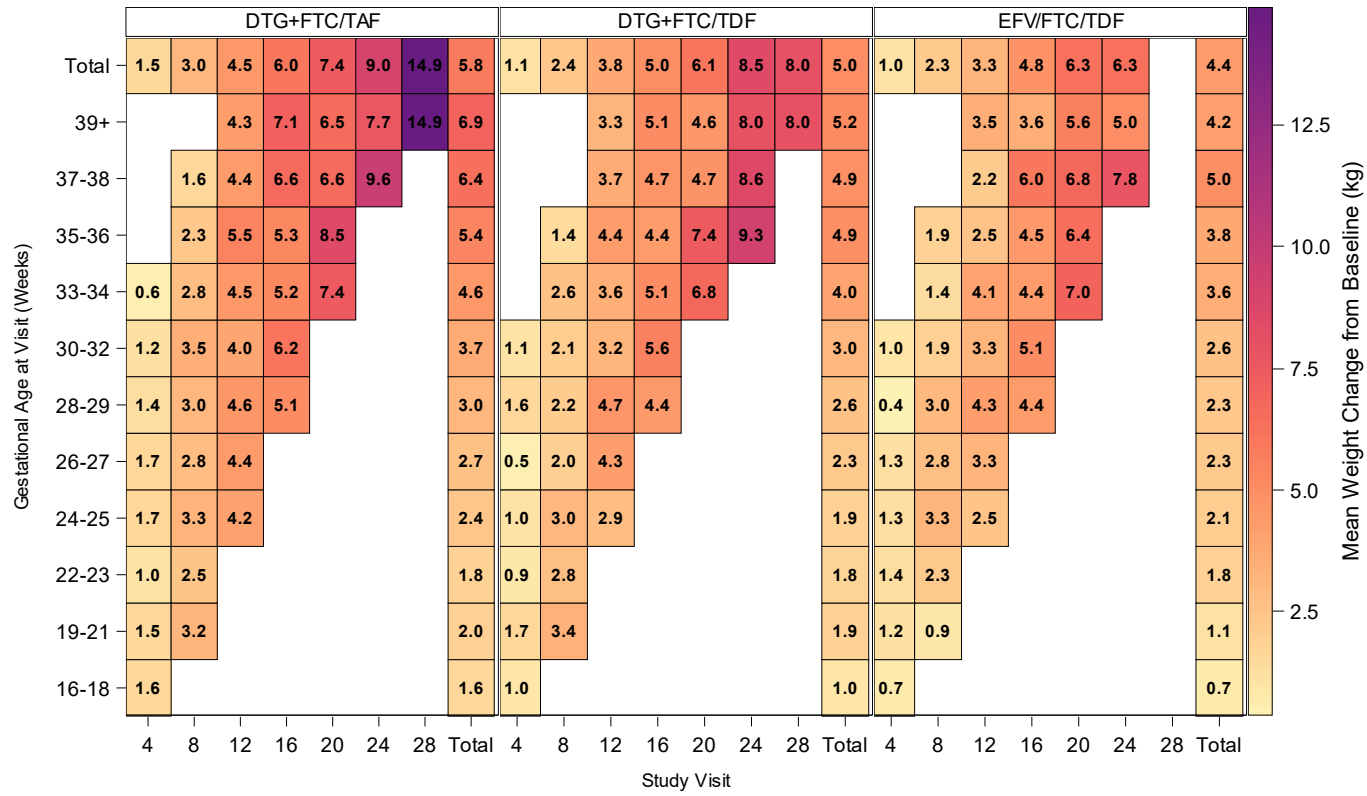



## Reference

1. Holmes LB, Westgate MN. Inclusion and exclusion criteria for malformations in newborn infants exposed to potential teratogens. *Birth Defects Res A Clin Mol Teratol* 2011; **91**(9): 807-12.
